# Supplementary material for: Formal total synthesis of calothrixin B and its N-benzyl analogues
Source: Royal Society of Chemistry journal article supplement (doi:10.1039/c5ra18120h), 2015-01-01

## Supporting Information

### Formal Total Synthesis of Calothrixin B and Its *N*-Benzyl Analogues

Nagarajan Ramkumar and Rajagopal Nagarajan\*

*School of Chemistry, University of Hyderabad, Hyderabad-500046, India.*

*E-mail: [rpsc@uohyd.ernet.in](mailto:rpsc@uohyd.ernet.in)*

#### Table of Contents

|                                                                        |        |
|------------------------------------------------------------------------|--------|
| General information                                                    | S2     |
| Experimental procedures and Characterization data                      | S2-S8  |
| References                                                             | S8     |
| <sup>1</sup> H, <sup>13</sup> C NMR and Mass spectra for all compounds | S9-S32 |

### **General Information and Methods:**

The NMR experiments were performed with 400 MHz or 500 MHz spectrometer, and chemical shifts are expressed in ppm ( $\delta$ ) with TMS as an internal reference. Coupling constant  $J$  values are given in Hz. IR spectra were recorded by using KBr pellets or neat. ESI-TOF mass analyzer type used for the HRMS measurements. Reactions were carried out under an inert atmosphere refer to the use of nitrogen and monitored by TLC. Column chromatography was performed on silica gel (100–200 mesh) in glass columns to purify the compounds. Solvents tetrahydrofuran (THF), *N,N*-dimethylformamide (DMF), *N*-methyl-2-pyrrolidone (NMP) and anisole were dried by using standard distillation methods. Commercially available reagents and solvents were used without further purification and were purchased. Melting points were determined using open capillary tubes and are uncorrected.

### **Procedure for the synthesis of 8-bromophenanthridine-7,10-dione (5):**

To a solution of 8-bromo-7,10-dimethoxy-5-(methoxymethyl)phenanthridin-6(5*H*)-one **3** (1 g, 2.6 mmol) in dry THF (30 mL), LiAlH<sub>4</sub> (500 mg, 13.2 mmol) was added a portionwise at 0 °C. The resulting mixture was allowed to stir at the same temperature for 2 h. After completion (TLC), the mixture was poured into 150 g of crushed ice. The precipitate formed was filtered through a celite pad and repeatedly washed with ethyl acetate (50 mL). The combined filtrate was further extracted with ethyl acetate (50 mL) and separated. The organic layer was dried over anhydrous Na<sub>2</sub>SO<sub>4</sub> and concentrated to give a crude oil.

The crude oil obtained (800 mg) was redissolved in acetonitrile (40 mL) and distilled water (20 mL). To this solution, CAN (700 mg, 1.26 mmol) was added and stirred for 2 h at room temperature. After completion of the reaction (TLC), the reaction mixture was poured into water (100 mL), extracted with ethyl acetate (3 × 50 mL) and dried over anhydrous Na<sub>2</sub>SO<sub>4</sub>.

The solvent was evaporated to afford crude oil which was purified by silica gel column chromatography using petroleum ether/ethyl acetate.

$R_f = 0.41$  (petroleum ether: EtOAc, 4:1); yellow solid (584 mg, 78%); mp 124-126 °C; IR (neat): 2968, 1738, 1588, 1365, 1212, 1013, 757  $\text{cm}^{-1}$ ;  $^1\text{H NMR}$  ( $\text{CDCl}_3$ , 400 MHz):  $\delta$  9.65 (s, 1H), 9.44 (d,  $J = 8.0$  Hz, 1H), 8.23 (d,  $J = 8.4$  Hz, 1H), 7.92 (t,  $J = 6.8$  Hz, 1H), 7.83 (t,  $J = 8.4$  Hz, 1H), 7.08 (s, 1H);  $^{13}\text{C NMR}$  ( $\text{CDCl}_3$ , 100 MHz):  $\delta$  188.1, 185.3, 152.0, 147.5, 139.9, 136.2, 132.1, 131.6, 130.6, 130.3, 127.6, 122.8, 122.0; HRMS (ESI):  $[\text{M}+\text{Na}]^+$  calcd for  $\text{C}_{13}\text{H}_6\text{BrNO}_2$  309.9480, found 309.9483.

**Procedure for the synthesis of 8-(2-chlorophenyl)phenanthridine-7,10-dione (7):**

To a solution of 8-bromophenanthridine-7,10-dione **5** (500 mg, 1.7 mmol) and (2-chlorophenyl)boronic acid **6** (540 mg, 3.4 mmol) in DMF (5 mL),  $\text{Pd}(\text{PPh}_3)_4$  (196 mg, 0.17 mmol) and  $\text{K}_2\text{CO}_3$  (470 mg, 3.4 mmol) were added. The resulting mixture was stirred at 140 °C for 8 h. After completion (TLC), the mixture was poured into water (100 mL) and extracted with ethyl acetate, washed with brine and dried over anhydrous  $\text{Na}_2\text{SO}_4$ . The solvent was evaporated to give crude residue which was purified by silica gel column chromatography using petroleum ether/ethyl acetate.

$R_f = 0.36$  (petroleum ether: EtOAc, 7:3); yellow solid (469 mg, 84%); mp 206-208 °C; IR (neat): 2978, 1658, 1588, 1335, 1212, 1043, 759  $\text{cm}^{-1}$ ;  $^1\text{H NMR}$  ( $\text{CDCl}_3$ , 400 MHz):  $\delta$  9.77 (s, 1H), 9.52 (d,  $J = 8.8$  Hz, 1H), 8.43 (d,  $J = 8.4$  Hz, 1H), 8.16 (t,  $J = 8.4$  Hz, 1H), 7.80 (t,  $J = 7.2$  Hz, 1H), 7.71 (t,  $J = 8.0$  Hz, 1H), 7.30-7.20 (m, 4H);  $^{13}\text{C NMR}$  ( $\text{CDCl}_3$ , 100 MHz):  $\delta$  187.9, 185.2, 152.1, 147.9, 140.1, 136.2, 135.1, 133.2, 131.3, 130.3, 130.1, 128.0, 127.8, 127.7, 125.1, 124.4, 123.9, 123.3, 123.1; HRMS (ESI):  $[\text{M}+\text{H}]^+$  calcd for  $\text{C}_{19}\text{H}_{10}\text{ClNO}_2$  320.0478, found 320.0475.

**General procedure for copper-catalyzed domino synthesis of *N*-benzylcalothrixins (9a-i):**

A Schlenk tube was equipped with a magnetic pellet, evacuated and back-filled with nitrogen. 8-(2-Chlorophenyl)phenanthridine-7,10-dione **7** (60 mg, 0.18 mmol), appropriate benzylamine **8a-i** (1.1 equiv), Cu powder (1 mg, 0.015 mmol), CuO (3 mg, 0.036 mmol), *t*-BuOK (42 mg, 0.37 mmol) and NMP (1 mL) were added. The resulting mixture was heated at 140 °C for appropriate time under nitrogen atmosphere. After completion of the reaction, the mixture was poured into water (25 mL) and filtered through a celite pad and washed with chloroform (60 mL). The organic layer was separated and washed with brine, and dried over anhydrous Na<sub>2</sub>SO<sub>4</sub>. The solvent was evaporated to give crude residue which was purified by silica gel column chromatography using petroleum ether/ethyl acetate.

**12-Benzyl-7*H*-indolo[3,2-*j*]phenanthridine-7,13(12*H*)-dione (9a):**

$R_f = 0.30$  (petroleum ether: EtOAc, 4:1); red solid (57 mg, 78%); mp 260-262 °C; IR (neat): 3040, 1653, 1538, 1430, 1258 cm<sup>-1</sup>; <sup>1</sup>H NMR (CDCl<sub>3</sub>, 400 MHz):  $\delta$  9.79 (s, 1H), 9.54 (d,  $J = 8.8$  Hz, 1H), 8.46-8.44 (dd,  $J = 1.2, 6.8$  Hz, 1H), 8.18 (d,  $J = 8.4$  Hz, 1H), 7.85-7.81 (m, 1H), 7.75-7.71 (m, 1H), 7.46-7.40 (m, 3H), 7.34-7.28 (m, 3H), 7.23 (d,  $J = 7.2$  Hz, 2H), 6.00 (s, 2H); <sup>13</sup>C NMR (CDCl<sub>3</sub>, 100 MHz):  $\delta$  181.9, 181.0, 152.1, 147.8, 140.1, 136.2, 135.1, 133.2, 131.1, 130.3, 130.1, 128.9 (2C), 128.0, 127.8, 127.6, 126.6 (2C), 125.1, 124.4, 123.9, 123.2, 123.1, 117.6, 111.5, 48.5; HRMS (ESI): [M+H]<sup>+</sup> calcd for C<sub>26</sub>H<sub>16</sub>N<sub>2</sub>O<sub>2</sub> 389.1290, found 389.1289.

**12-(4-Methylbenzyl)-7*H*-indolo[3,2-*j*]phenanthridine-7,13(12*H*)-dione (9b):**

$R_f = 0.65$  (petroleum ether: EtOAc, 7:3); red solid (57 mg, 76%); mp 246-248 °C; IR (neat): 3030, 2922, 1736, 1649, 1522, 1459, 1239, 1075, 753 cm<sup>-1</sup>; <sup>1</sup>H NMR (CDCl<sub>3</sub>, 400 MHz):  $\delta$  9.77 (s, 1H), 9.54 (d,  $J = 8.8$  Hz, 1H), 8.43 (d,  $J = 7.2$  Hz, 1H), 8.17 (d,  $J = 8.4$  Hz, 1H), 7.82

(t,  $J = 7.2$  Hz, 1H), 7.73 (t,  $J = 7.2$  Hz, 1H), 7.47-7.38 (m, 3H), 7.14-7.10 (m, 4H), 5.94 (s, 2H), 2.30 (s, 3H);  $^{13}\text{C}$  NMR ( $\text{CDCl}_3$ , 100 MHz):  $\delta$  181.9, 180.9, 152.0, 147.8, 140.0, 137.6, 135.0, 133.26, 133.22, 131.3, 130.2, 130.0, 129.5 (2C), 127.9, 127.7, 126.6 (2C), 125.1, 124.4, 123.8, 123.2, 123.1, 117.6, 111.6, 48.3, 21.0; HRMS (ESI):  $[\text{M}+\text{H}]^+$  calcd for  $\text{C}_{27}\text{H}_{18}\text{N}_2\text{O}_2$  403.1446, found 403.1439.

**12-(4-Methoxybenzyl)-7H-indolo[3,2-j]phenanthridine-7,13(12H)-dione (9c):**

$R_f = 0.61$  (petroleum ether: EtOAc, 7:3); red solid (63 mg, 81%): mp 230-232 °C; IR (neat): 3008, 2248, 1740, 1369, 1222, 1050, 757  $\text{cm}^{-1}$ ;  $^1\text{H}$  NMR ( $\text{CDCl}_3$ , 400 MHz):  $\delta$  9.74 (s, 1H), 9.52 (d,  $J = 8.4$  Hz, 1H), 8.39 (d,  $J = 7.6$  Hz, 1H), 8.15 (d,  $J = 8.4$  Hz, 1H), 7.80 (t,  $J = 7.2$  Hz, 1H), 7.71 (t,  $J = 8.0$  Hz, 1H), 7.46-7.35 (m, 3H), 7.19 (d,  $J = 8.8$  Hz, 2H), 6.83 (d,  $J = 8.8$  Hz, 2H), 5.88 (s, 2H), 3.75 (s, 3H);  $^{13}\text{C}$  NMR ( $\text{CDCl}_3$ , 100 MHz):  $\delta$  181.8, 180.8, 159.2, 152.1, 147.8, 139.9, 134.9, 133.1, 131.3, 130.3, 130.0, 128.3, 128.1 (2C), 127.8, 127.6, 125.0, 124.4, 123.8, 123.2, 123.0, 117.5, 114.2 (2C), 111.5, 55.2, 47.9; HRMS (ESI):  $[\text{M}+\text{H}]^+$  calcd for  $\text{C}_{27}\text{H}_{18}\text{N}_2\text{O}_3$  419.1395, found 419.1382.

**12-(4-Chlorobenzyl)-7H-indolo[3,2-j]phenanthridine-7,13(12H)-dione (9d):**

$R_f = 0.65$  (petroleum ether: EtOAc, 7:3); red solid (49 mg, 63%): mp 242-244 °C; IR (neat): 2920, 1739, 1646, 1456, 1365, 1229, 1075, 751  $\text{cm}^{-1}$ ;  $^1\text{H}$  NMR ( $\text{CDCl}_3$ , 500 MHz):  $\delta$  9.80 (s, 1H), 9.54 (dd,  $J = 1.0, 9.0$  Hz, 1H), 8.48-8.46 (m, 1H), 8.20 (dd,  $J = 1.0, 8.5$  Hz, 1H), 7.85 (td,  $J = 1.5, 8.5$  Hz, 1H), 7.75 (td,  $J = 1.5, 8.5$  Hz, 1H), 7.51-7.43 (m, 3H), 7.29 (d,  $J = 8.5$  Hz, 2H), 7.18 (d,  $J = 9.0$  Hz, 2H), 5.97 (s, 2H);  $^{13}\text{C}$  NMR ( $\text{CDCl}_3$ , 125 MHz):  $\delta$  182.0, 181.0, 152.2, 147.8, 140.0, 135.0, 134.7, 133.8, 133.2, 131.4, 130.4, 130.2, 129.1 (2C), 128.2, 128.0 (2C), 127.6, 125.3, 124.4, 124.0, 123.3, 123.1, 117.8, 111.3, 47.9; HRMS (ESI):  $[\text{M}+\text{H}]^+$  calcd for  $\text{C}_{26}\text{H}_{15}\text{ClN}_2\text{O}_2$  423.0900, found 423.0896.

**12-(4-Fluorobenzyl)-7*H*-indolo[3,2-*j*]phenanthridine-7,13(12*H*)-dione (9e):**

$R_f = 0.72$  (petroleum ether: EtOAc, 7:3); red solid (44 mg, 58%); mp 228-230 °C; IR (neat): 2920, 2851, 1649, 1506, 1463, 1339, 1232, 1074, 757  $\text{cm}^{-1}$ ;  $^1\text{H}$  NMR ( $\text{CDCl}_3$ , 500 MHz):  $\delta$  9.79 (s, 1H), 9.54 (d,  $J = 8.5$  Hz, 1H), 8.45 (d,  $J = 8.0$  Hz, 1H), 8.19 (d,  $J = 8.5$  Hz, 1H), 7.85-7.82 (td,  $J = 1.0, 7.0$  Hz, 1H), 7.76-7.73 (td,  $J = 1.0, 6.5$  Hz, 1H), 7.48-7.41 (m, 3H), 7.25-7.22 (m, 2H), 7.01 (t,  $J = 8.5$  Hz, 2H), 5.96 (s, 2H);  $^{13}\text{C}$  NMR ( $\text{CDCl}_3$ , 125 MHz):  $\delta$  182.0, 180.9, 152.1, 147.8, 139.9, 134.9, 133.2, 132.0, 131.9, 131.4, 130.3, 130.2, 128.5, 128.4, 128.1, 127.6, 125.2, 124.4, 124.0, 123.3, 123.1, 117.7, 111.3, 47.9; HRMS (ESI):  $[\text{M}+\text{H}]^+$  calcd for  $\text{C}_{26}\text{H}_{15}\text{FN}_2\text{O}_2$  407.1196, found 407.1189.

**12-(3,4-Dimethoxybenzyl)-7*H*-indolo[3,2-*j*]phenanthridine-7,13(12*H*)-dione (9f):**

$R_f = 0.64$  (petroleum ether: EtOAc, 1:1); red solid (72 mg, 86%); mp 186-188 °C; IR (neat): 2922, 1733, 1645, 1512, 1239, 1139, 1019, 739  $\text{cm}^{-1}$ ;  $^1\text{H}$  NMR ( $\text{CDCl}_3$ , 400 MHz):  $\delta$  9.70 (s, 1H), 9.48 (d,  $J = 8.8$  Hz, 1H), 8.35 (d,  $J = 7.2$  Hz, 1H), 8.13 (d,  $J = 8.4$  Hz, 1H), 7.78 (t,  $J = 7.2$  Hz, 1H), 7.69 (t,  $J = 7.6$  Hz, 1H), 7.43-7.31 (m, 3H), 6.86 (s, 1H), 6.76-6.68 (m, 2H), 5.85 (s, 2H), 3.809 (s, 3H), 3.804 (s, 3H);  $^{13}\text{C}$  NMR ( $\text{CDCl}_3$ , 100 MHz):  $\delta$  181.8, 180.7, 152.0, 149.2, 148.7, 147.7, 139.9, 134.9, 133.0, 131.3, 130.2, 130.0, 128.7, 127.8, 127.6, 125.0, 124.3, 123.7, 123.1, 123.0, 119.0, 117.5, 111.5, 111.3, 110.3, 55.9, 55.8, 48.2; HRMS (ESI):  $[\text{M}]^+$  calcd for  $\text{C}_{28}\text{H}_{20}\text{N}_2\text{O}_4$  448.1423, found 448.1433.

**12-(2,4-Dichlorobenzyl)-7*H*-indolo[3,2-*j*]phenanthridine-7,13(12*H*)-dione (9g):**

$R_f = 0.57$  (petroleum ether: EtOAc, 4:1); red solid (37 mg, 46%); mp 256-258 °C; IR (neat): 3004, 2127, 1710, 1424, 1359, 1219, 783  $\text{cm}^{-1}$ ;  $^1\text{H}$  NMR ( $\text{CDCl}_3$ , 400 MHz):  $\delta$  9.84 (s, 1H), 9.53 (d,  $J = 8.8$  Hz, 1H), 8.53-8.51 (m, 1H), 8.22 (d,  $J = 8.4$  Hz, 1H), 7.86 (t,  $J = 6.8$  Hz, 1H), 7.75 (t,  $J = 7.2$  Hz, 1H), 7.55 (s, 1H), 7.51-7.49 (m, 2H), 7.36-7.35 (m, 1H), 7.05 (d,  $J = 8.4$

Hz, 1H), 6.44 (d,  $J = 8.4$  Hz, 1H), 6.07 (s, 2H); **Note:**  $^{13}\text{C}$  NMR was unable to record due to its poor solubility in common NMR solvents. HRMS (ESI):  $[\text{M}+\text{H}]^+$  calcd for  $\text{C}_{26}\text{H}_{14}\text{Cl}_2\text{N}_2\text{O}_2$  457.0510, found 457.0512.

**12-(3-Methoxybenzyl)-7H-indolo[3,2-j]phenanthridine-7,13(12H)-dione (9h):**

$R_f = 0.56$  (petroleum ether: EtOAc, 7:3); red solid (62 mg, 80%); mp 192-194 °C; IR (neat): 2945, 2837, 1649, 1457, 1239, 749  $\text{cm}^{-1}$ ;  $^1\text{H}$  NMR ( $\text{CDCl}_3$ , 400 MHz):  $\delta$  9.81 (s, 1H), 9.56 (d,  $J = 8.0$  Hz, 1H), 8.47 (d,  $J = 7.2$  Hz, 1H), 8.20 (d,  $J = 7.6$  Hz, 1H), 7.84 (t,  $J = 6.8$  Hz, 1H), 7.75 (t,  $J = 7.2$  Hz, 1H), 7.48-7.42 (m, 3H), 7.24 (t,  $J = 8.0$  Hz, 1H), 6.83-6.77 (m, 3H), 6.00 (s, 2H), 3.75 (s, 3H);  $^{13}\text{C}$  NMR ( $\text{CDCl}_3$ , 100 MHz):  $\delta$  182.0, 181.0, 160.0, 152.2, 147.9, 140.1, 137.8, 135.1, 133.3, 131.3, 130.3, 130.1, 130.0, 128.0, 127.7, 125.1, 124.5, 123.9, 123.3, 123.1, 118.8, 117.7, 112.8, 112.6, 111.5, 55.2, 48.4; HRMS (ESI):  $[\text{M}+\text{H}]^+$  calcd for  $\text{C}_{27}\text{H}_{18}\text{N}_2\text{O}_3$  419.1395, found 419.1387.

**12-(2-Bromobenzyl)-7H-indolo[3,2-j]phenanthridine-7,13(12H)-dione (9i):**

$R_f = 0.50$  (petroleum ether: EtOAc, 4:1); red solid (59 mg, 68%); mp 234-236 °C; IR (neat): 2968, 1738, 1588, 1446, 1365, 1212, 1013, 757  $\text{cm}^{-1}$ ;  $^1\text{H}$  NMR ( $\text{CDCl}_3$ , 500 MHz):  $\delta$  9.75 (s, 1H), 9.47 (d,  $J = 9.0$  Hz, 1H), 8.46-8.43 (m, 1H), 8.15 (d,  $J = 8.5$  Hz, 1H), 7.81-7.78 (td,  $J = 1.0, 7.0$  Hz, 1H), 7.70-7.67 (m, 2H), 7.43-7.41 (m, 2H), 7.30-7.28 (m, 1H), 7.14-7.11 (td,  $J = 1.5, 7.5$  Hz, 1H), 7.08-7.04 (td,  $J = 1.5, 8.0$  Hz, 1H), 6.40-6.38 (dd,  $J = 1.0, 7.5$  Hz, 1H), 6.00 (s, 2H);  $^{13}\text{C}$  NMR ( $\text{CDCl}_3$ , 125 MHz):  $\delta$  181.8, 180.9, 152.1, 147.8, 139.9, 135.3, 135.2, 133.1, 133.0, 131.5, 130.27, 130.21, 129.1, 128.2, 127.9, 127.6, 126.3, 125.4, 124.4, 123.9, 123.2, 123.0, 122.0, 117.8, 111.3, 49.0; HRMS (ESI):  $[\text{M}+\text{H}]^+$  calcd for  $\text{C}_{26}\text{H}_{15}\text{BrN}_2\text{O}_2$  467.0395, found 467.0398.

**Procedure for the synthesis of 7*H*-indolo[3,2-*j*]phenanthridine-7,13(12*H*)-dione (Calothrixin B) (2):**

To a solution of 12-(3,4-dimethoxybenzyl)-7*H*-indolo[3,2-*j*]phenanthridine-7,13(12*H*)-dione **9f** (25 mg, 0.055 mmol) in dry anisole (3 mL), anhydrous AlCl<sub>3</sub> (37 mg, 0.277 mmol) was added and heated at 100 °C for 8 h. After completion of the reaction, the reaction mixture was quenched with water and extracted with ethyl acetate (3 × 30 mL). The organic layer was washed with saturated aqueous Na<sub>2</sub>CO<sub>3</sub> solution (30 mL) and separated, and dried over anhydrous Na<sub>2</sub>SO<sub>4</sub>. The solvent was evaporated to give crude residue which was purified by silica gel column chromatography using petroleum ether/ethyl acetate.

R<sub>f</sub> = 0.30 (petroleum ether: EtOAc, 5:1); red solid (11 mg, 68%): mp > 300 °C (lit.<sup>1</sup> mp ≥ 300 °C); IR (neat): 3430, 2968, 1653, 1425, 1089 cm<sup>-1</sup>; <sup>1</sup>H NMR (DMSO-*d*<sub>6</sub>, 400 MHz): δ 9.60 (s, 1H), 9.56 (d, *J* = 8.8 Hz, 1H), 8.17-8.14 (dd, *J* = 3.2, 6.4 Hz, 2H), 7.94 (t, *J* = 6.8 Hz, 1H), 7.87 (t, *J* = 8.0 Hz, 1H), 7.60 (d, *J* = 8.0 Hz, 1H), 7.46 (t, *J* = 7.2 Hz, 1H), 7.38 (t, *J* = 7.2 Hz, 1H) (**Note:** *N*-**H** not observed); <sup>13</sup>C NMR (DMSO-*d*<sub>6</sub>, 400 MHz): δ 181.3, 180.8, 151.7, 147.9, 138.8, 138.5, 133.1, 132.0, 130.7, 130.3, 129.7, 127.6, 125.3, 124.8, 123.8, 123.0, 122.7, 116.0, 114.4; HRMS (ESI): [M+H]<sup>+</sup> calcd for C<sub>19</sub>H<sub>10</sub>N<sub>2</sub>O<sub>2</sub> 299.0820, found 299.0818.

**References:**

- 1 R. W. Rickards, J. M. Rothschild, A. C. Willis, N. M. de Chazal, J. Kirk, K. Kirk, K. J. Saliba and G. D. Smith, *Tetrahedron* 1999, **55**, 13513.



# <sup>1</sup>H and <sup>13</sup>C NMR of 8-bromophenanthridine-7,10-dione (5)

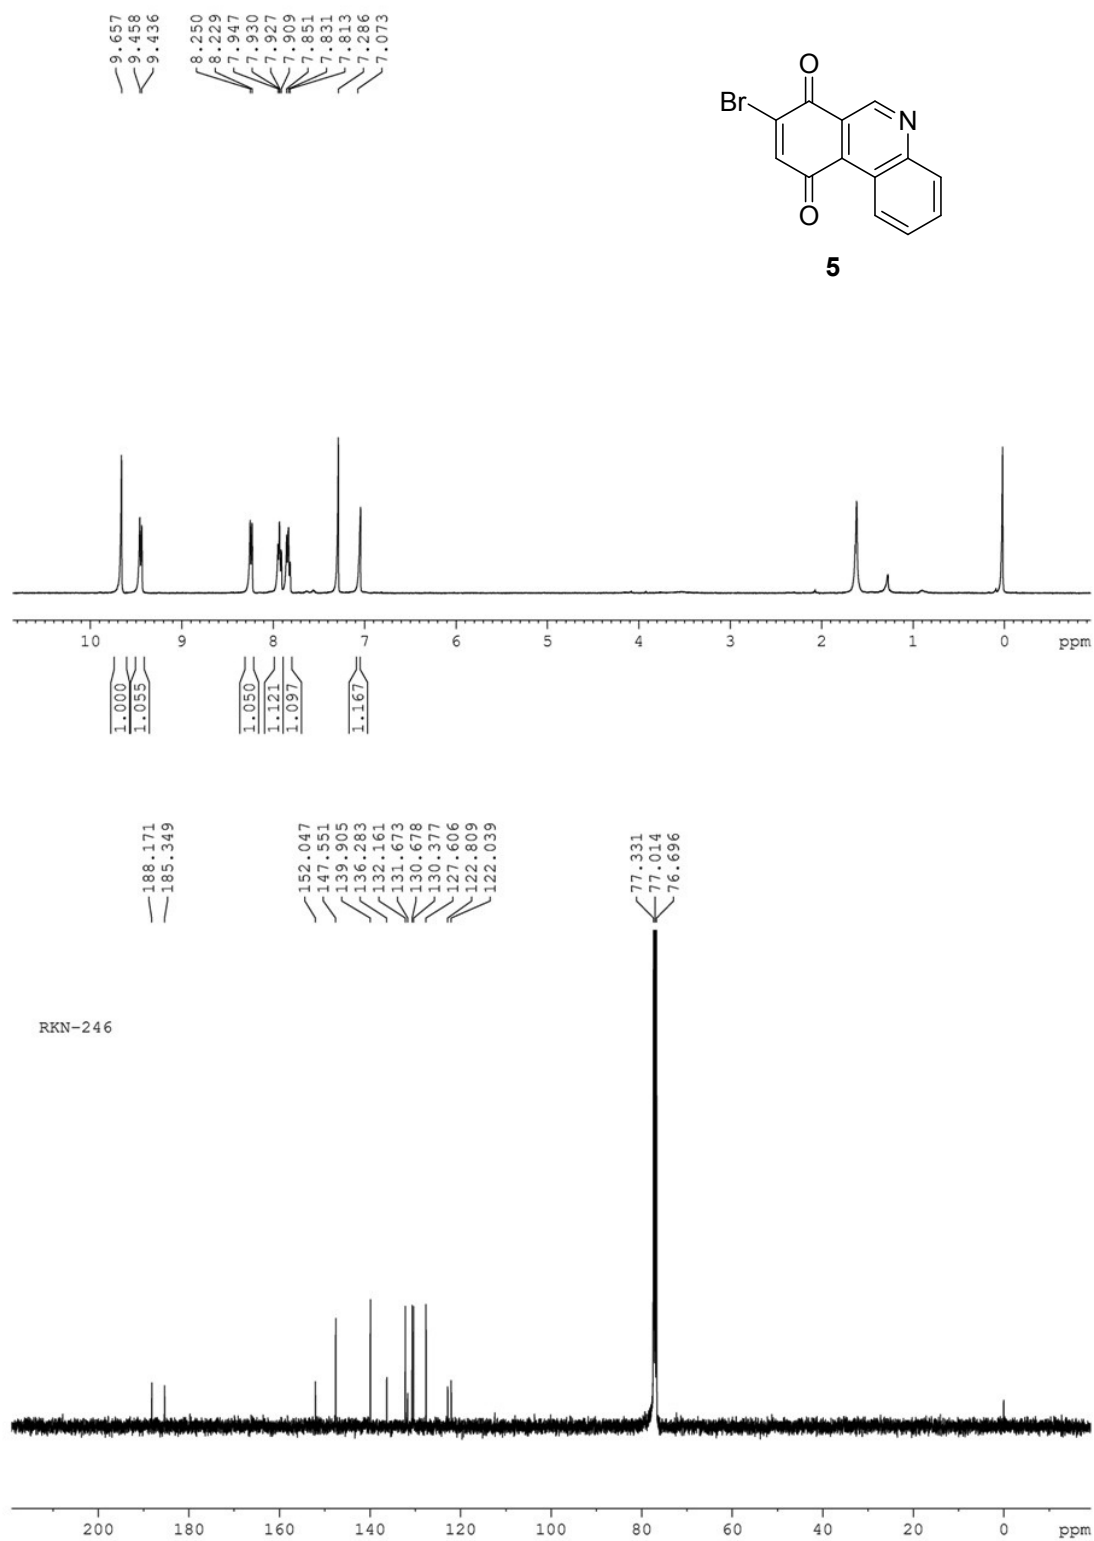

# HRMS of 8-bromophenanthridine-7,10-dione (5)

## BRUKER MAXIS HRMS REPORT

School of Chemistry  
University of Hyderabad

### Analysis Info

Analysis Name D:\Data\2015\DrNagarajan\JULY\RKN-286.d  
Method tune\_low.m  
Sample Name RKN-286-DCM-MEOH  
Comment

Acquisition Date 7/14/2015 11:15:12 AM

Operator Ramu Sridhar  
Instrument maXis 10138

### Acquisition Parameter

|             |            |                       |           |                  |           |
|-------------|------------|-----------------------|-----------|------------------|-----------|
| Source Type | ESI        | Ion Polarity          | Positive  | Set Nebulizer    | 4.4 psi   |
| Focus       | Not active | Set Capillary         | 3200 V    | Set Dry Heater   | 180 °C    |
| Scan Begin  | 50 m/z     | Set End Plate Offset  | -500 V    | Set Dry Gas      | 4.0 l/min |
| Scan End    | 1700 m/z   | Set Collision Cell RF | 150.0 Vpp | Set Divert Valve | Waste     |

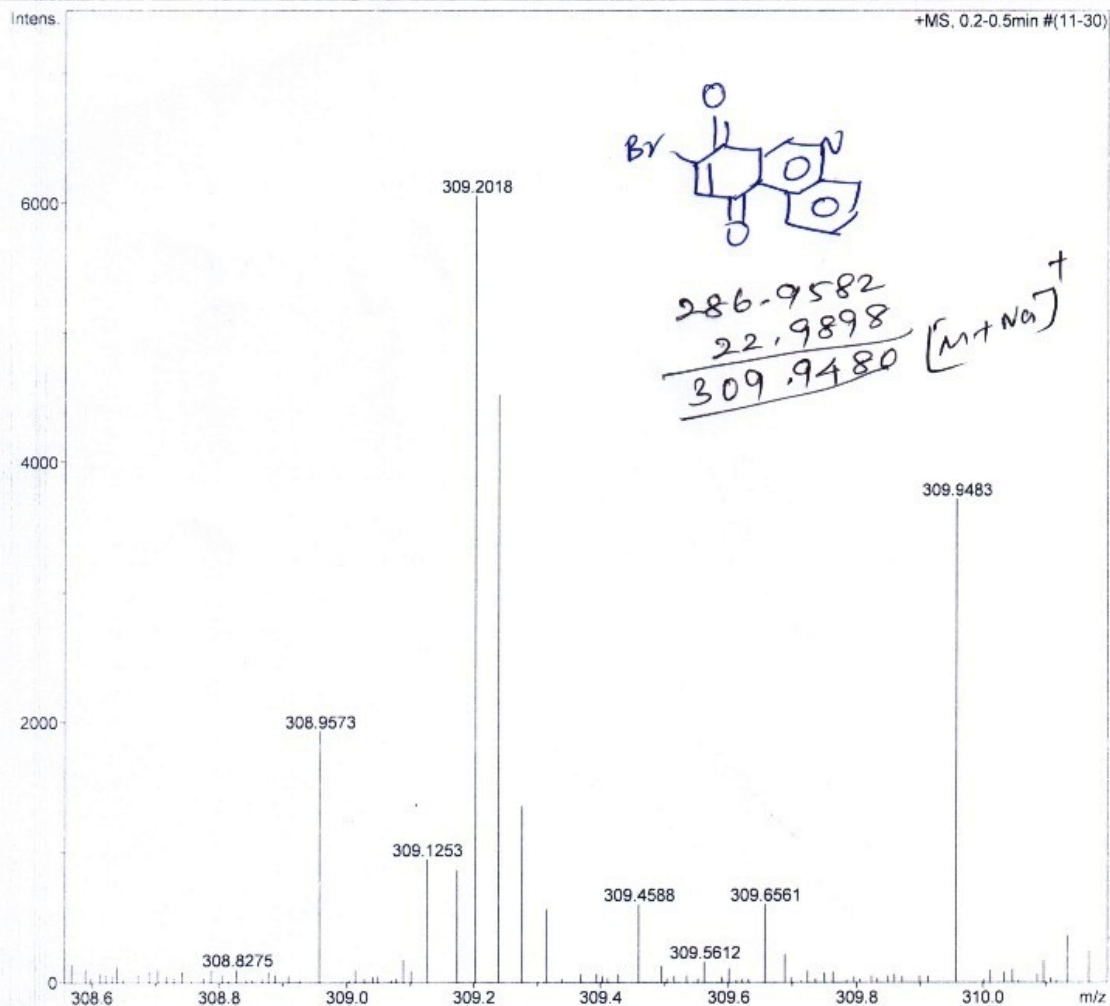

# $^1\text{H}$ and $^{13}\text{C}$ NMR of 8-(2-chlorophenyl)phenanthridine-7,10-dione (7)

9.774  
9.533  
9.511  
8.447  
8.426  
8.177  
8.156  
7.827  
7.809  
7.789  
7.732  
7.712  
7.693  
7.305  
7.286  
7.270  
7.261  
7.220  
7.202

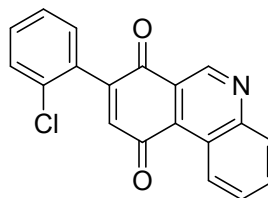

7

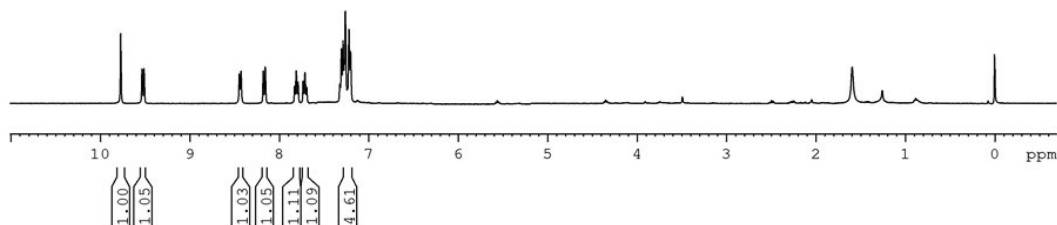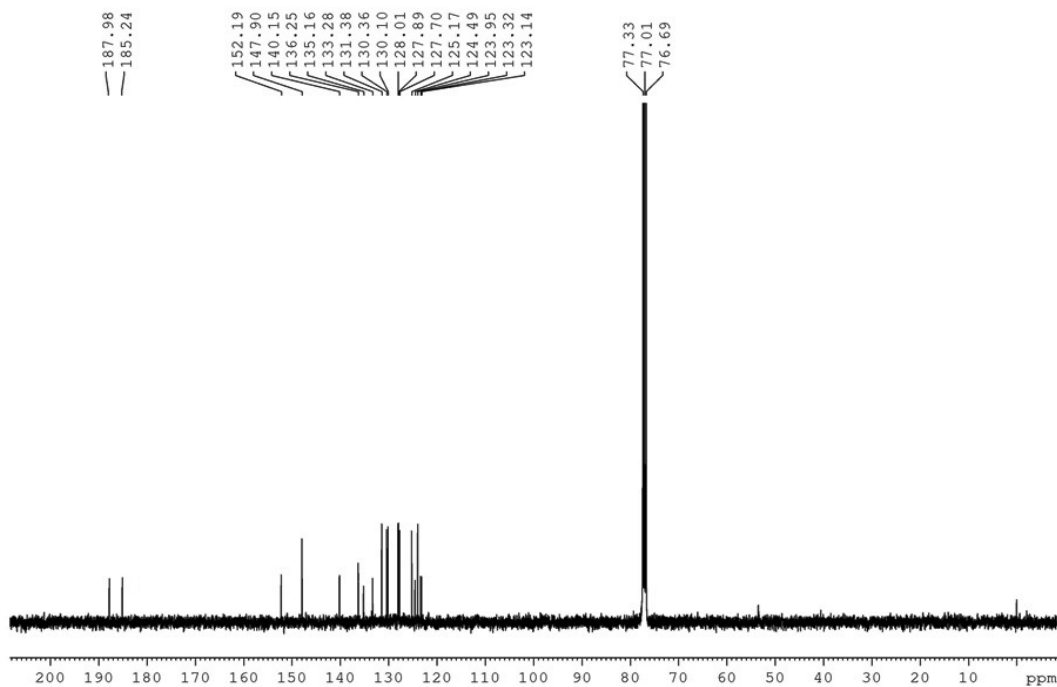

# HRMS of 8-(2-chlorophenyl)phenanthridine-7,10-dione (7)

## BRUKER MAXIS HRMS REPORT

School of Chemistry  
University of Hyderabad

### Analysis Info

Analysis Name D:\Data\2015\DrNagarajan\JULY\RKN-359.d  
Method tune\_low.m  
Sample Name RKN-359-DCM-MEOH  
Comment

Acquisition Date 7/14/2015 11:47:15 AM

Operator Ramu Sridhar  
Instrument maXis 10138

### Acquisition Parameter

|             |            |                       |           |                  |           |
|-------------|------------|-----------------------|-----------|------------------|-----------|
| Source Type | ESI        | Ion Polarity          | Positive  | Set Nebulizer    | 4.4 psi   |
| Focus       | Not active | Set Capillary         | 3200 V    | Set Dry Heater   | 180 °C    |
| Scan Begin  | 50 m/z     | Set End Plate Offset  | -500 V    | Set Dry Gas      | 4.0 l/min |
| Scan End    | 1700 m/z   | Set Collision Cell RF | 150.0 Vpp | Set Divert Valve | Waste     |

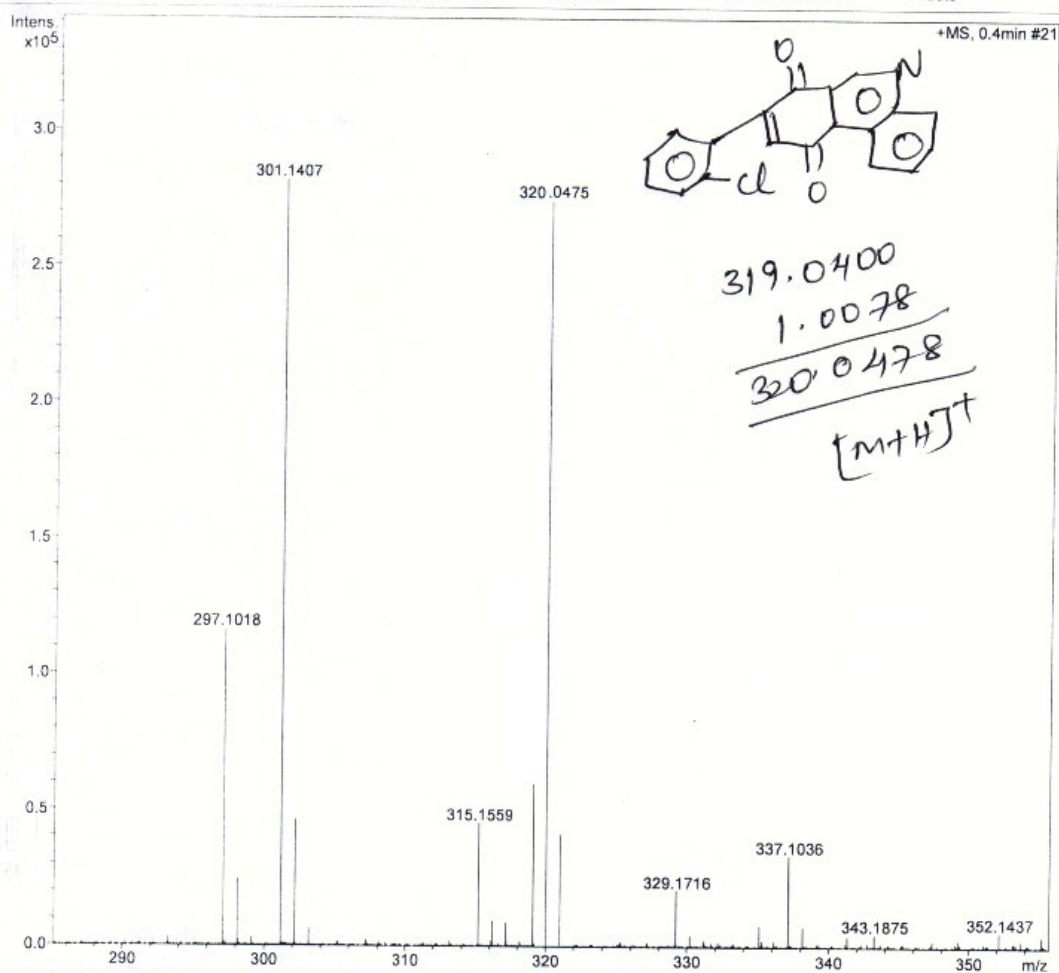

# $^1\text{H}$ and $^{13}\text{C}$ NMR of 12-benzyl-7*H*-indolo[3,2-*j*]phenanthridine-7,13(12*H*)-dione (9a)

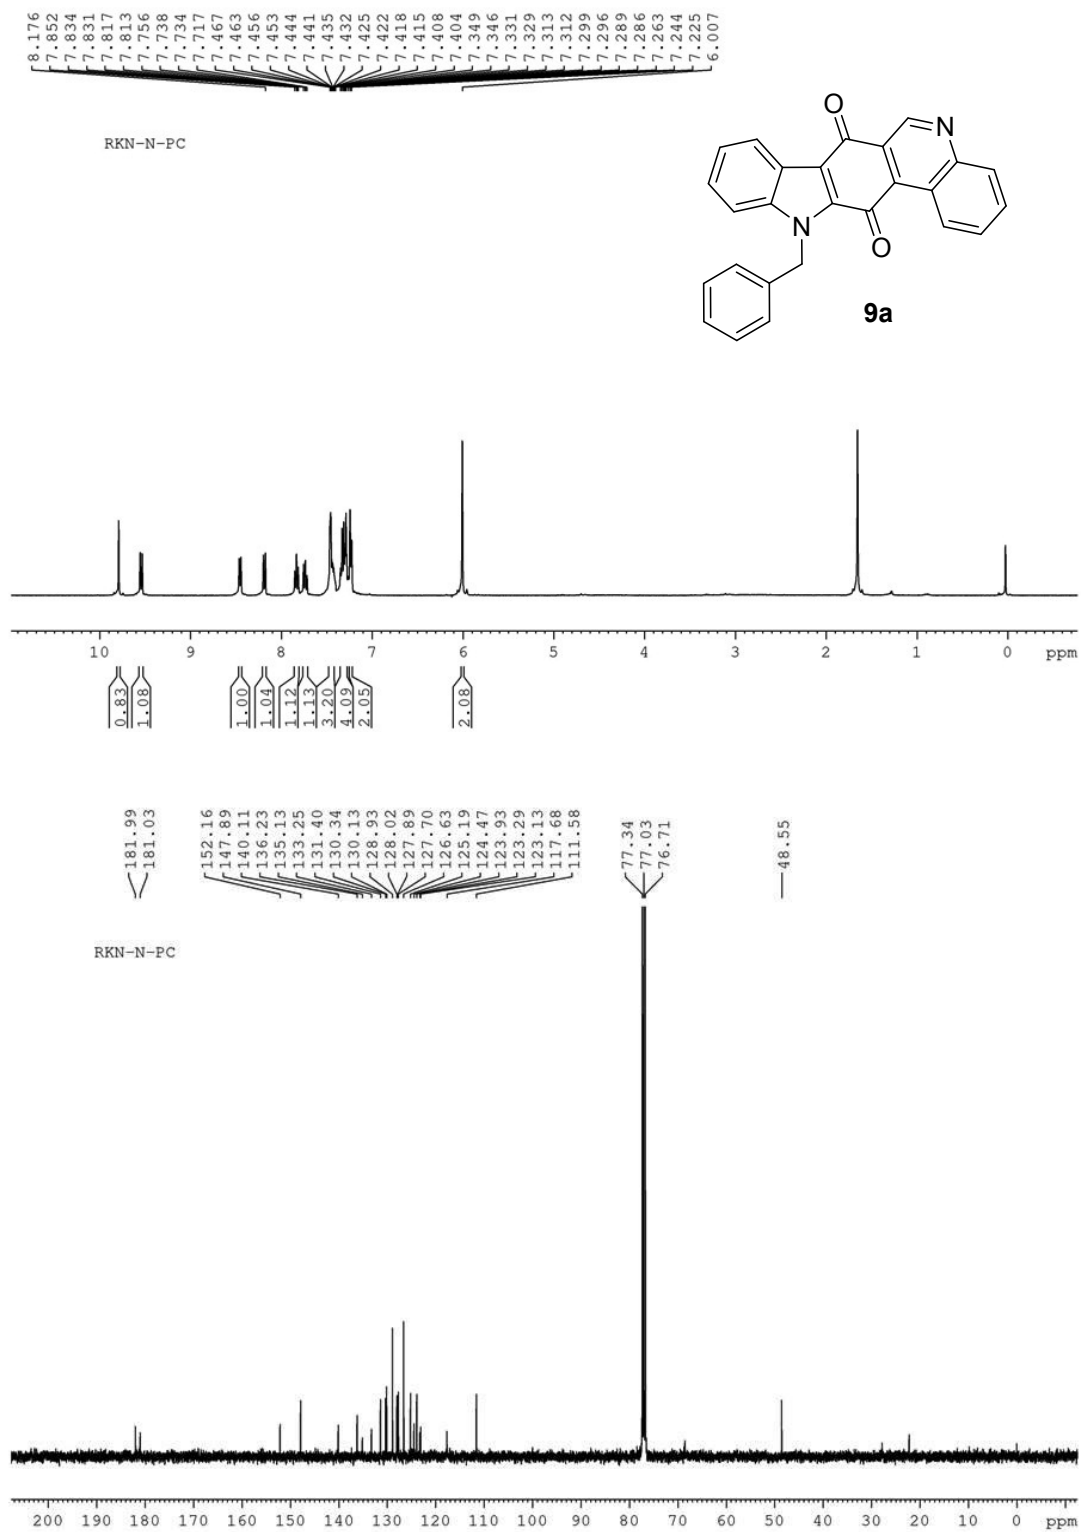

# HRMS of 12-benzyl-7H-indolo[3,2-j]phenanthridine-7,13(12H)-dione (9a)

## BRUKER MAXIS HRMS REPORT

School of Chemistry  
University of Hyderabad

### Analysis Info

Analysis Name D:\Data\2015\DrNagarajan\JULY\RKN-388-1.d  
Method tune\_low.m  
Sample Name RKN-388-1-MEOH  
Comment

Acquisition Date 7/8/2015 12:04:13 PM

Operator Ramu Sridhar  
Instrument maXis 10138

### Acquisition Parameter

|             |            |                       |           |                  |           |
|-------------|------------|-----------------------|-----------|------------------|-----------|
| Source Type | ESI        | Ion Polarity          | Positive  | Set Nebulizer    | 4.4 psi   |
| Focus       | Not active | Set Capillary         | 4500 V    | Set Dry Heater   | 180 °C    |
| Scan Begin  | 50 m/z     | Set End Plate Offset  | -500 V    | Set Dry Gas      | 4.0 l/min |
| Scan End    | 1700 m/z   | Set Collision Cell RF | 150.0 Vpp | Set Divert Valve | Waste     |

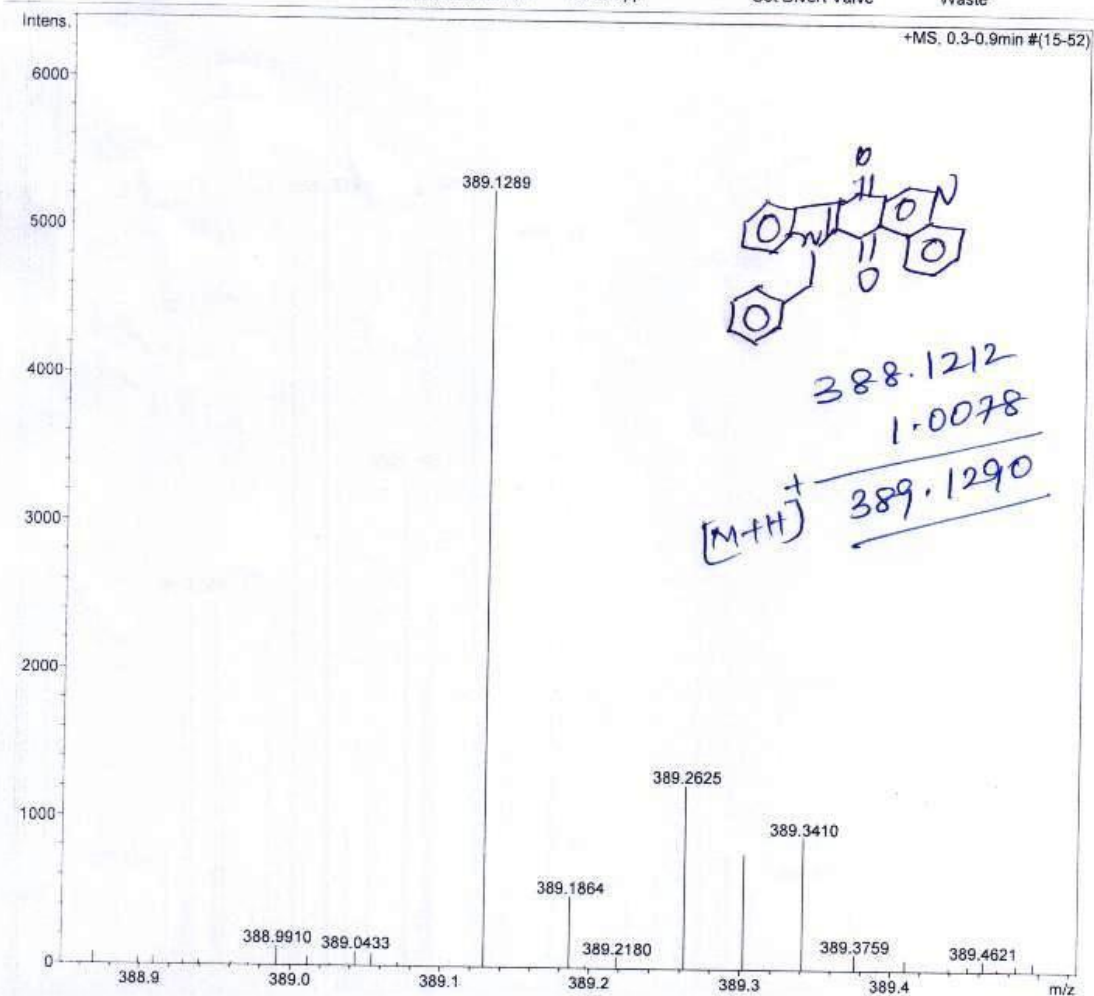

**<sup>1</sup>H and <sup>13</sup>C NMR of 12-(4-methylbenzyl)-7*H*-indolo[3,2-*j*]phenanthridine-7,13(12*H*)-dione (9b)**

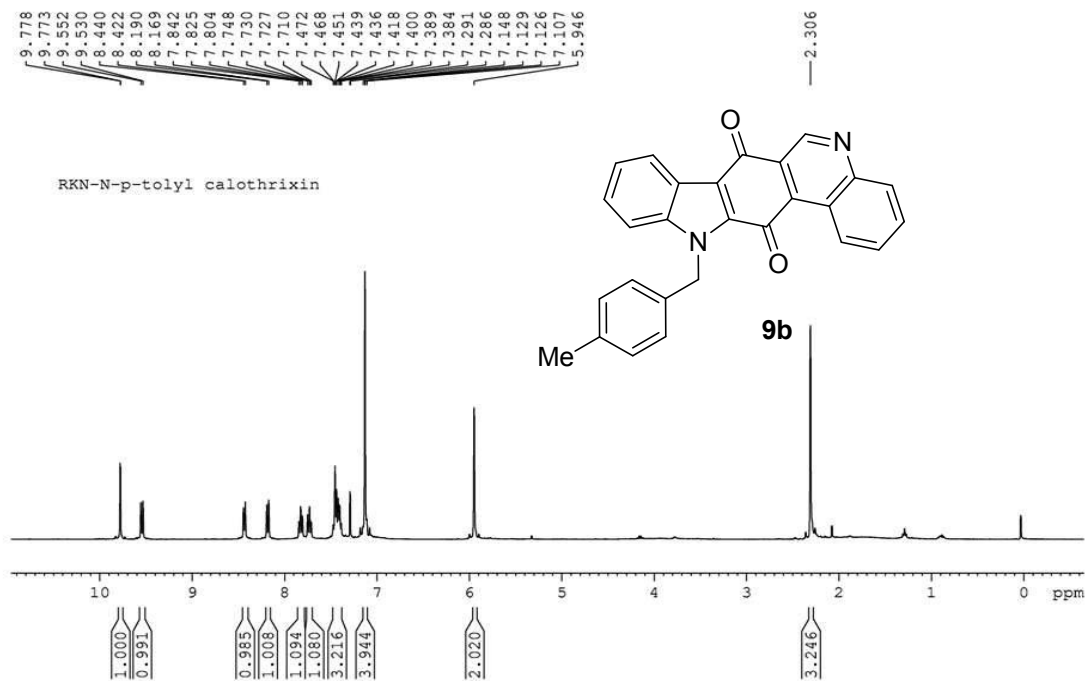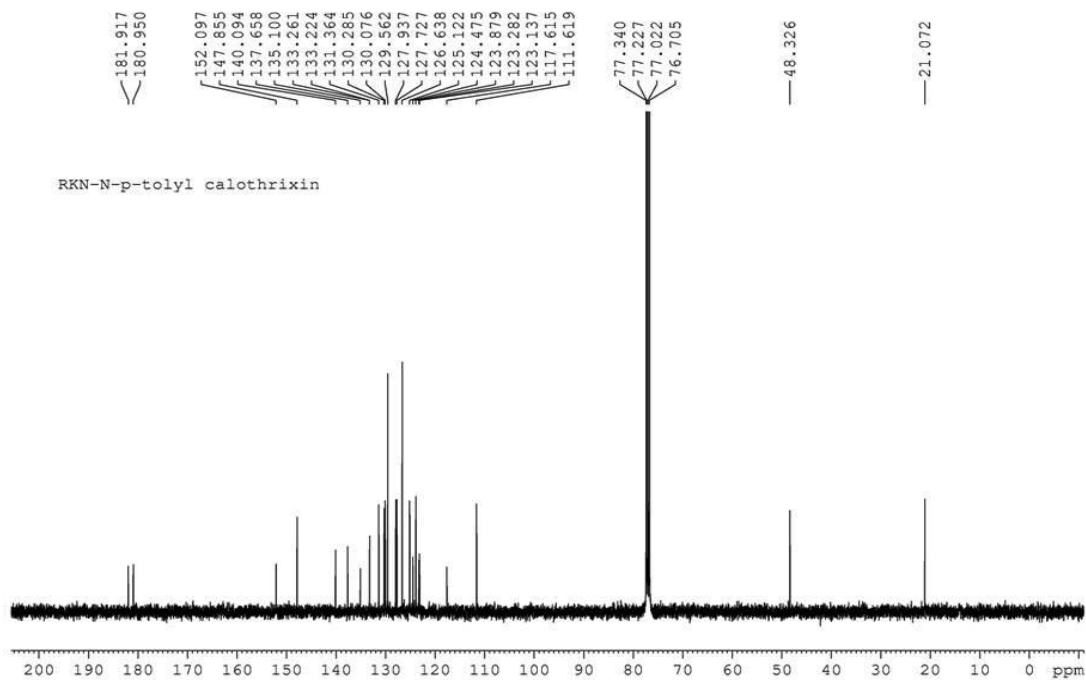

# HRMS of 12-(4-methylbenzyl)-7H-indolo[3,2-j]phenanthridine-7,13(12H)-dione (9b)

## BRUKER MAXIS HRMS REPORT

School of Chemistry  
University of Hyderabad

### Analysis Info

Analysis Name D:\Data\2015\DrNagarajan\JUNE\RKN-402R2.d  
Method tune\_low\_Pos.m  
Sample Name RKN-402-MEOH  
Comment

Acquisition Date 6/5/2015 11:34:44 AM

Operator Ramu Sridhar  
Instrument maXis 10138

### Acquisition Parameter

|             |            |                       |           |                  |           |
|-------------|------------|-----------------------|-----------|------------------|-----------|
| Source Type | ESI        | Ion Polarity          | Positive  | Set Nebulizer    | 4.4 psi   |
| Focus       | Not active | Set Capillary         | 3800 V    | Set Dry Heater   | 180 °C    |
| Scan Begin  | 50 m/z     | Set End Plate Offset  | -500 V    | Set Dry Gas      | 4.0 l/min |
| Scan End    | 1500 m/z   | Set Collision Cell RF | 350.0 Vpp | Set Divert Valve | Waste     |

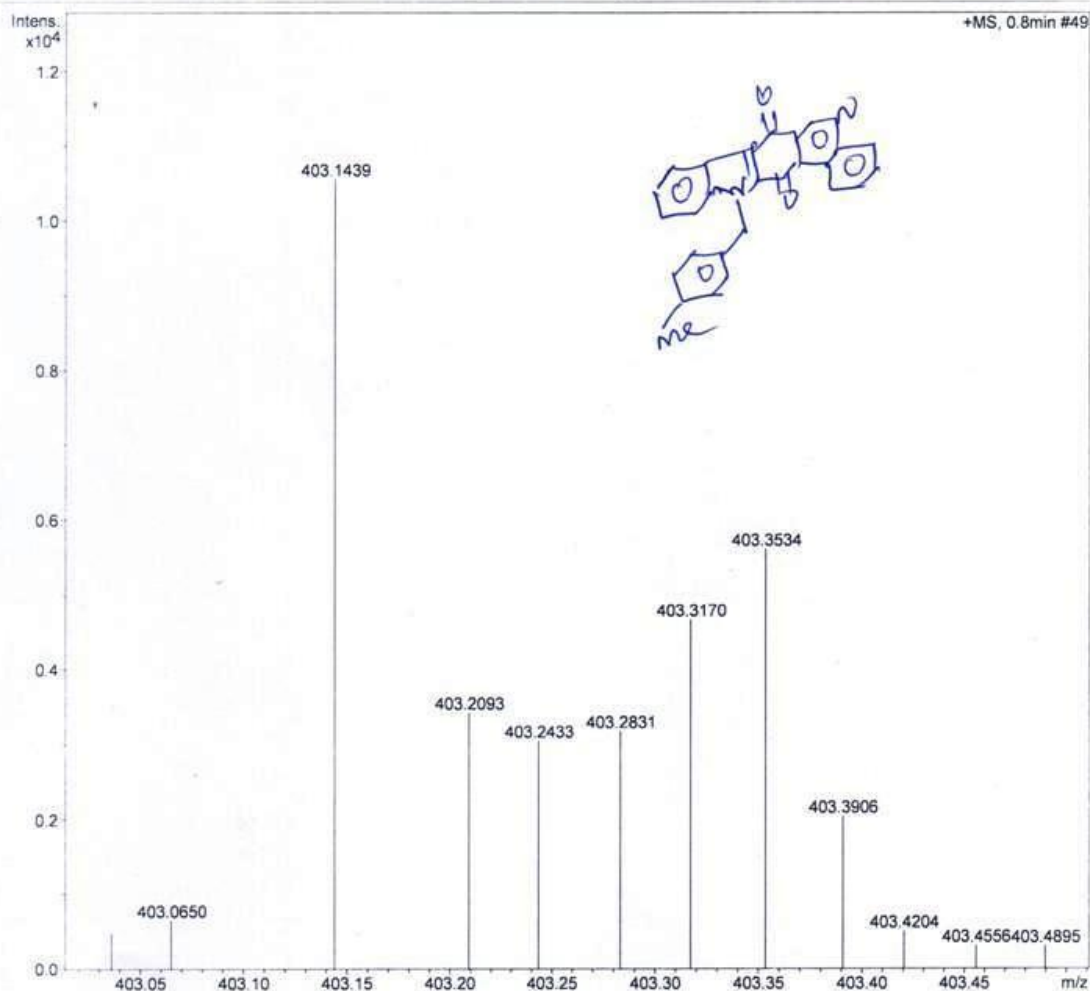



**<sup>1</sup>H and <sup>13</sup>C NMR of 12-(4-methoxybenzyl)-7*H*-indolo[3,2-*j*]phenanthridine-7,13(12*H*)-dione (9c)**

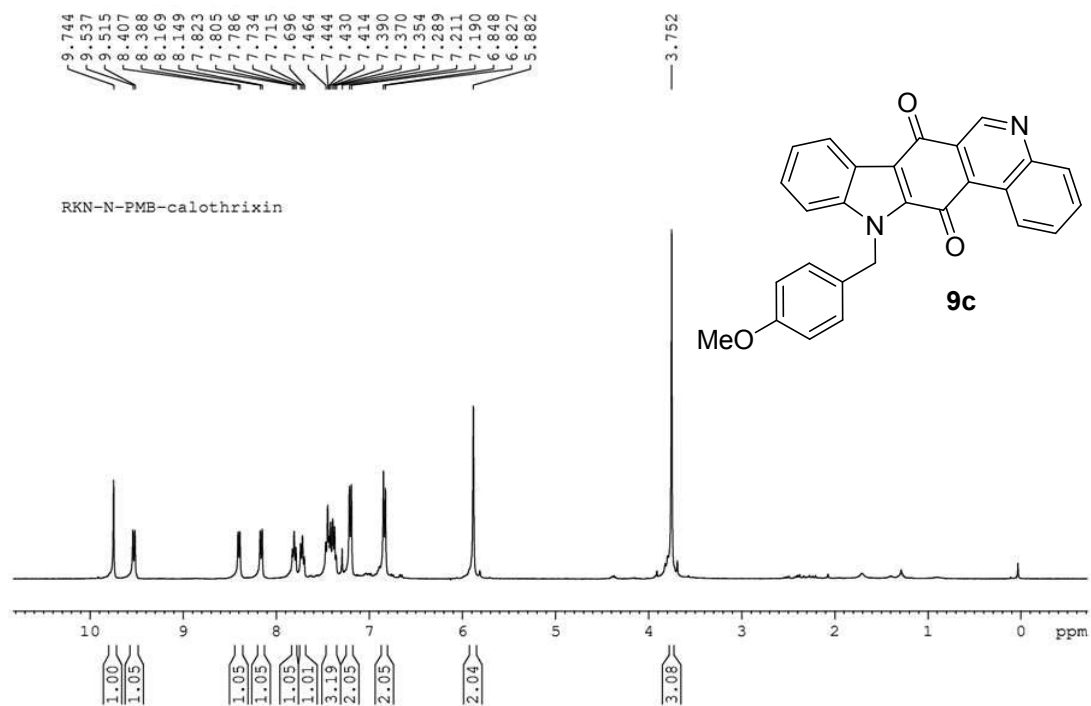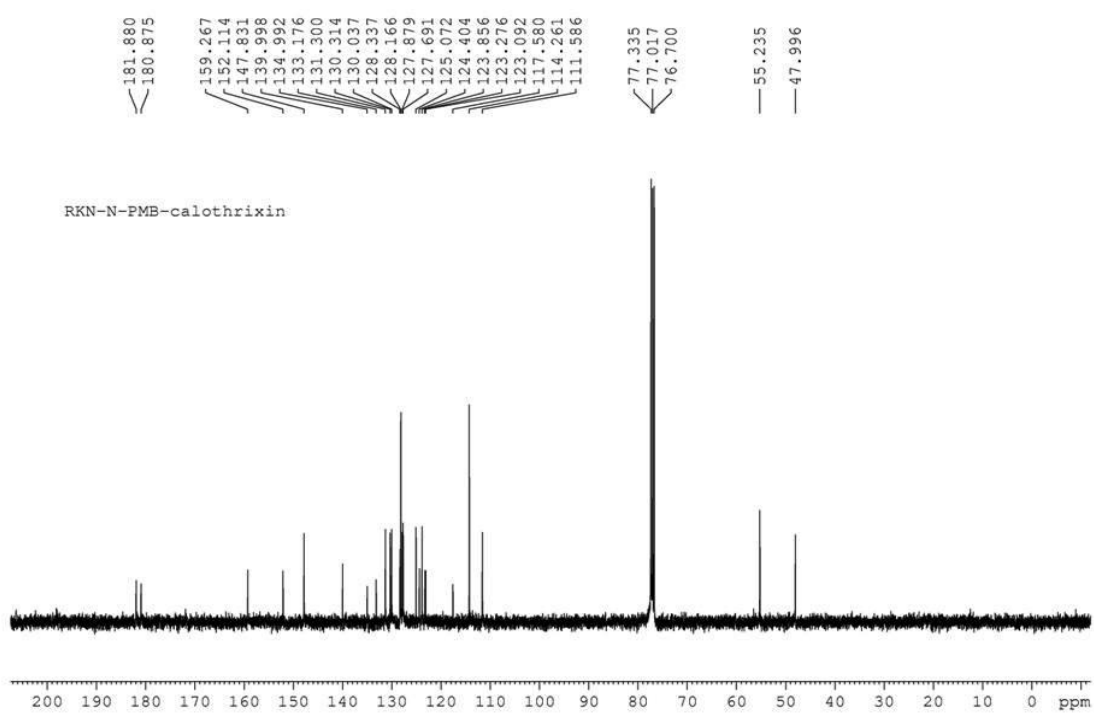

# HRMS of 12-(4-methoxybenzyl)-7H-indolo[3,2-j]phenanthridine-7,13(12H)-dione (9c)

## BRUKER MAXIS HRMS REPORT

School of Chemistry  
University of Hyderabad

### Analysis Info

Analysis Name D:\Data\2015\DrNagarajan\JUNE\RKN-418R1.d  
Method tune\_low\_Pos.m  
Sample Name RKN-418-MEOH  
Comment

Acquisition Date 6/5/2015 11:54:34 AM

Operator Ramu Sridhar  
Instrument maXis 10138

### Acquisition Parameter

|             |            |                       |           |                  |           |
|-------------|------------|-----------------------|-----------|------------------|-----------|
| Source Type | ESI        | Ion Polarity          | Positive  | Set Nebulizer    | 4.4 psi   |
| Focus       | Not active | Set Capillary         | 3800 V    | Set Dry Heater   | 180 °C    |
| Scan Begin  | 50 m/z     | Set End Plate Offset  | -500 V    | Set Dry Gas      | 4.0 l/min |
| Scan End    | 1500 m/z   | Set Collision Cell RF | 350.0 Vpp | Set Divert Valve | Waste     |

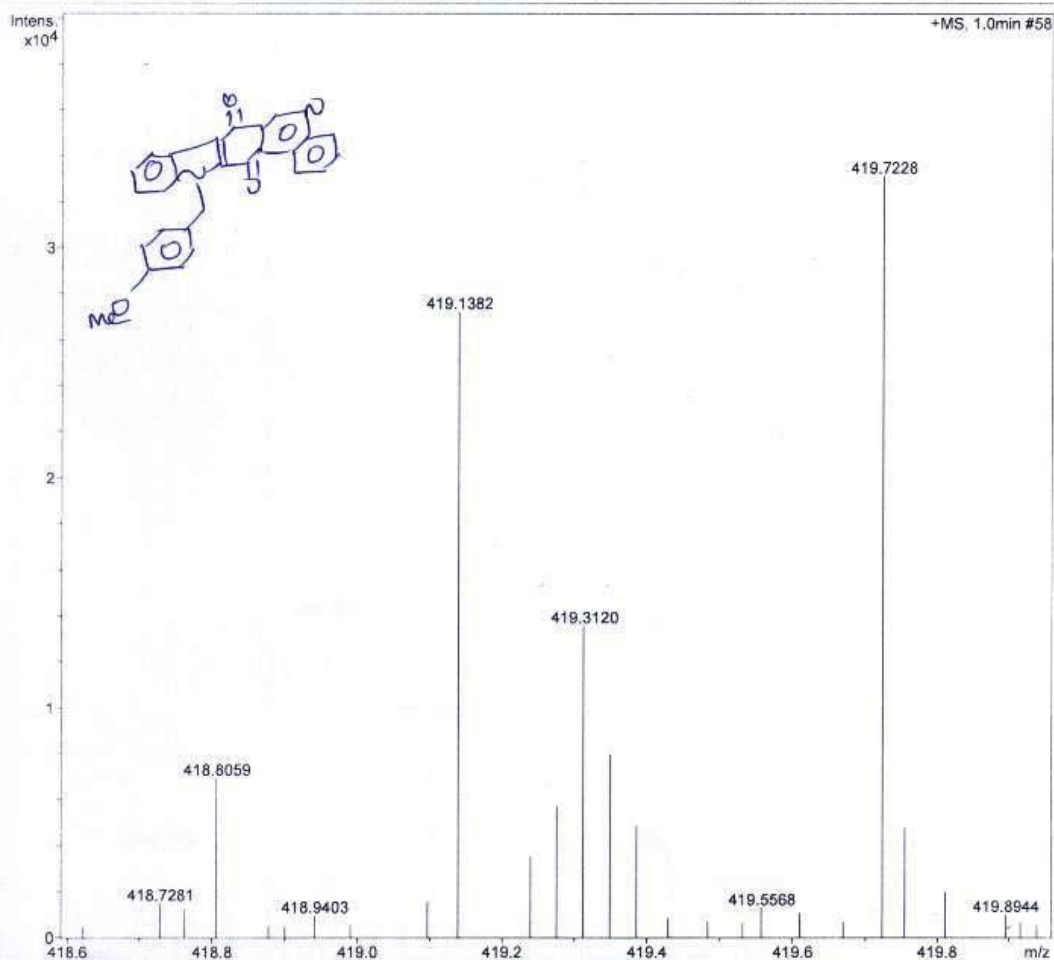

**<sup>1</sup>H and <sup>13</sup>C NMR of 12-(4-chlorobenzyl)-7H-indolo[3,2-j]phenanthridine-7,13(12H)-dione (9d)**

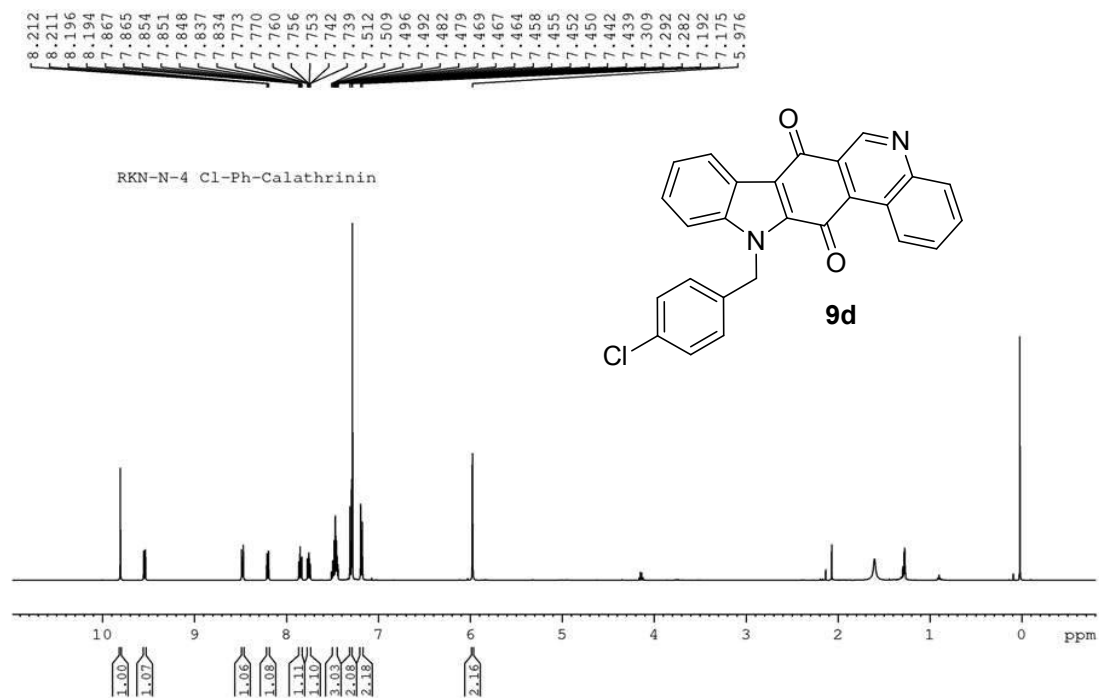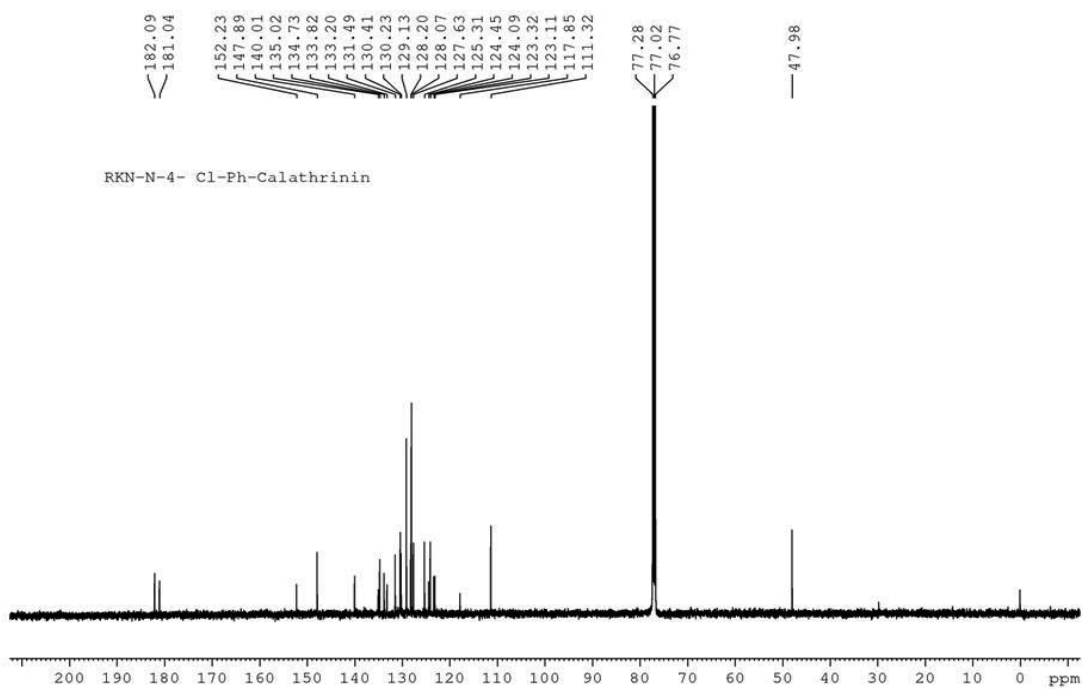

# HRMS of 12-(4-chlorobenzyl)-7H-indolo[3,2-j]phenanthridine-7,13(12H)-dione (9d)

## BRUKER MAXIS HRMS REPORT

School of Chemistry  
University of Hyderabad

### Analysis Info

Analysis Name D:\Data\2015\DrNagarajan\JUNE\RKN-422.d  
Method tune\_low.m  
Sample Name RKN-422-MEOH  
Comment

Acquisition Date 6/30/2015 12:49:14 PM

Operator Ramu Sridhar  
Instrument maXis 10138

### Acquisition Parameter

|             |            |                       |           |                  |           |
|-------------|------------|-----------------------|-----------|------------------|-----------|
| Source Type | ESI        | Ion Polarity          | Positive  | Set Nebulizer    | 6.0 psi   |
| Focus       | Not active | Set Capillary         | 4500 V    | Set Dry Heater   | 180 °C    |
| Scan Begin  | 50 m/z     | Set End Plate Offset  | -500 V    | Set Dry Gas      | 6.0 l/min |
| Scan End    | 1700 m/z   | Set Collision Cell RF | 150.0 Vpp | Set Divert Valve | Waste     |

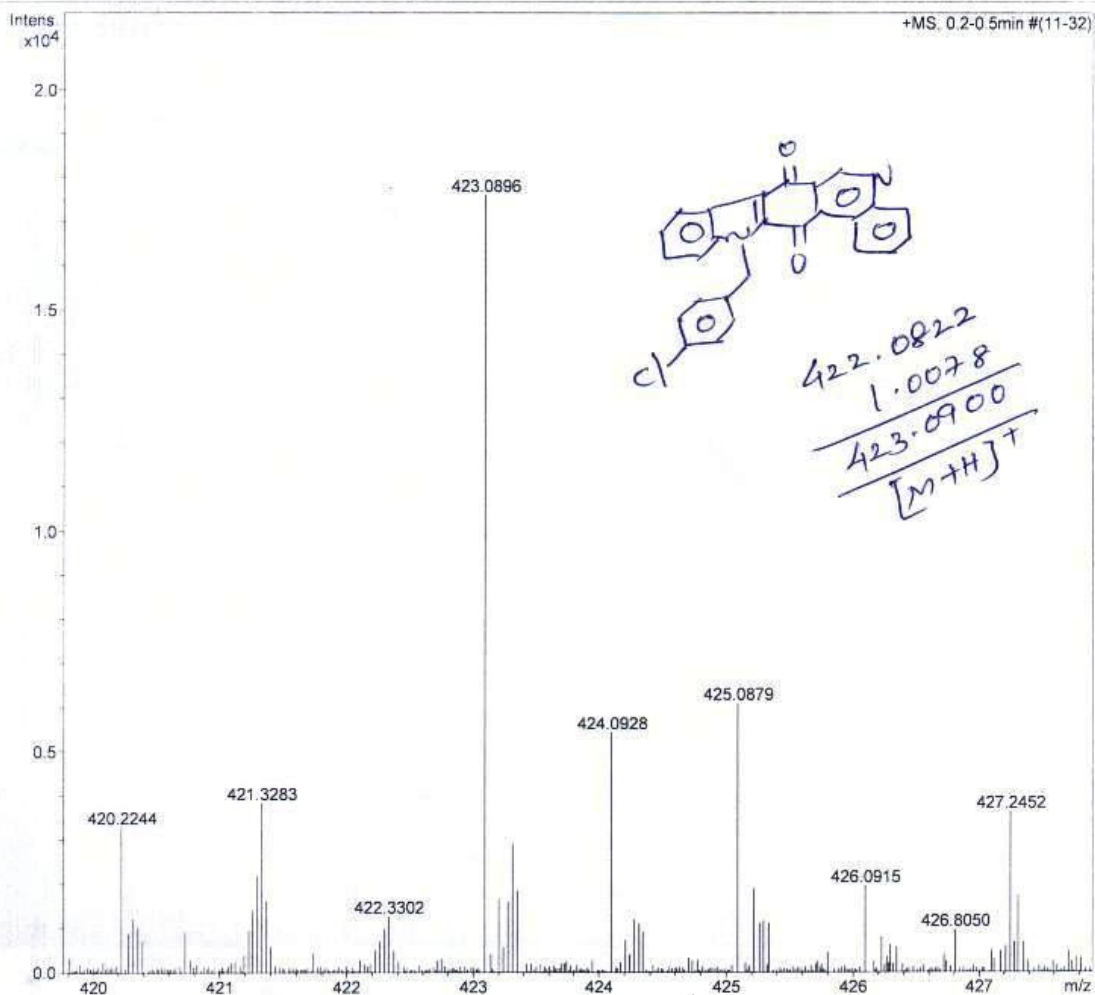

**$^1\text{H}$  and  $^{13}\text{C}$  NMR of 12-(4-fluorobenzyl)-7*H*-indolo[3,2-*j*]phenanthridine-7,13(12*H*)-dione (9e)**

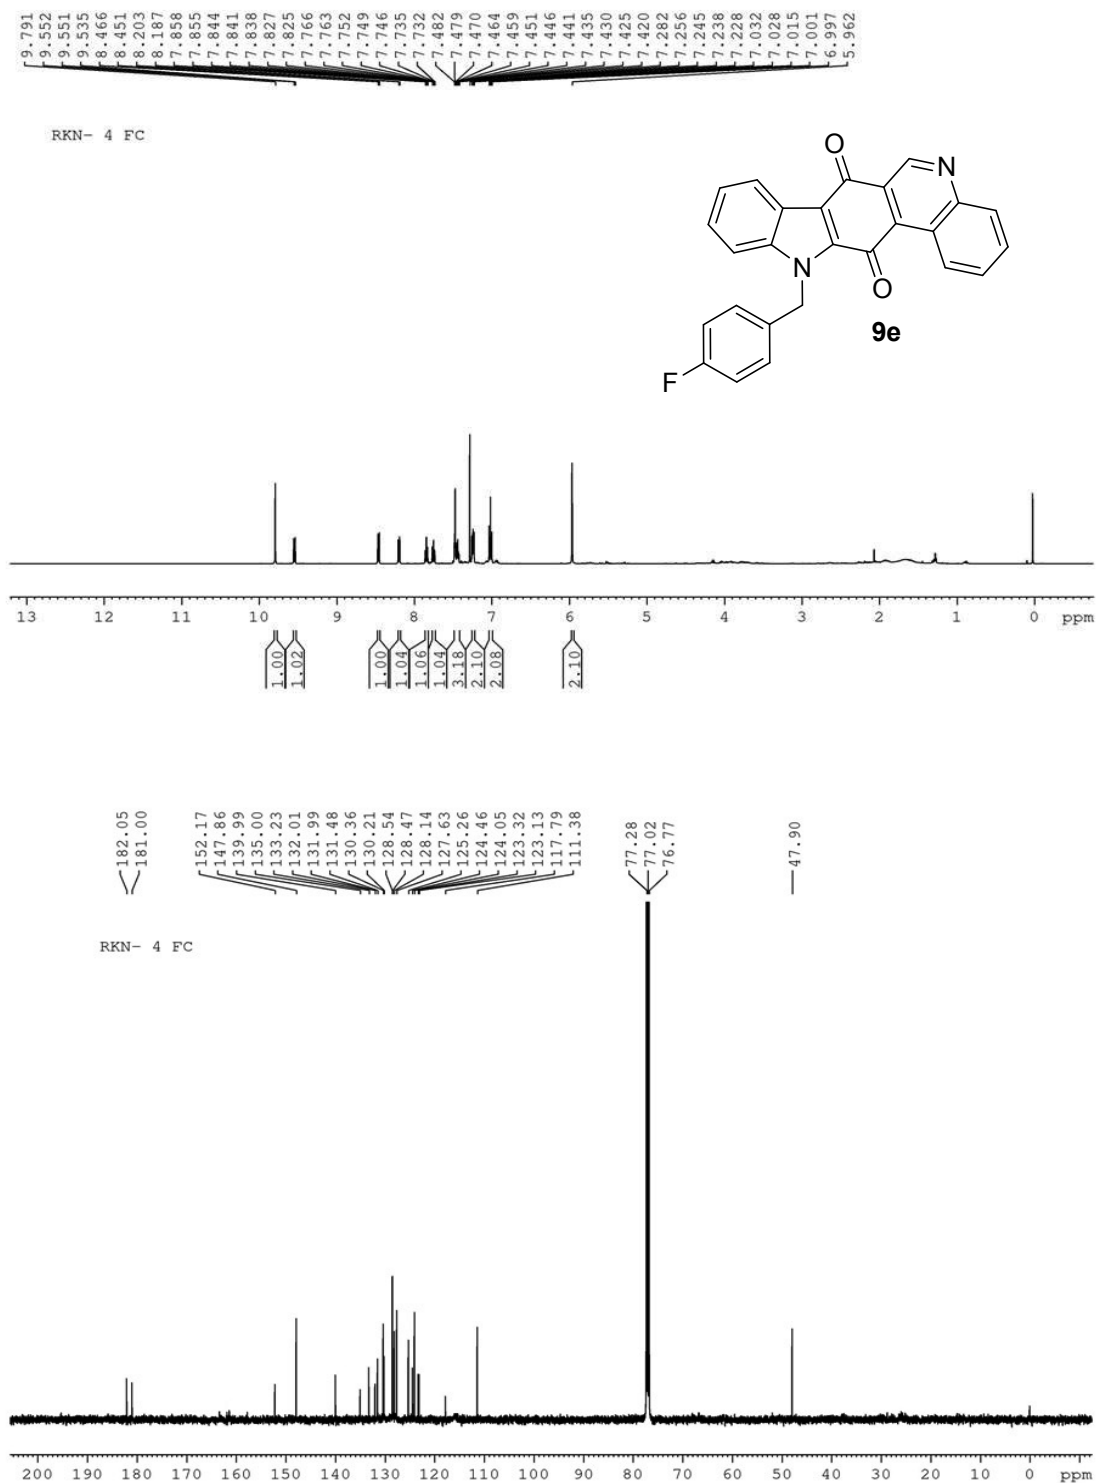

# HRMS of 12-(4-fluorobenzyl)-7H-indolo[3,2-j]phenanthridine-7,13(12H)-dione (9e)

## BRUKER MAXIS HRMS REPORT School of Chemistry University of Hyderabad

### Analysis Info

Analysis Name D:\Data\2015\DrNagarajan\JUNE\RKN-406R2.d  
Method tune\_low.m  
Sample Name RKN-406-MEOH  
Comment

Acquisition Date 6/30/2015 12:27:30 PM

Operator Ramu Sridhar  
Instrument maXis 10138

### Acquisition Parameter

|             |            |                       |           |                  |           |
|-------------|------------|-----------------------|-----------|------------------|-----------|
| Source Type | ESI        | Ion Polarity          | Positive  | Set Nebulizer    | 5.0 psi   |
| Focus       | Not active | Set Capillary         | 3800 V    | Set Dry Heater   | 180 °C    |
| Scan Begin  | 50 m/z     | Set End Plate Offset  | -500 V    | Set Dry Gas      | 5.0 l/min |
| Scan End    | 1700 m/z   | Set Collision Cell RF | 150.0 Vpp | Set Divert Valve | Waste     |

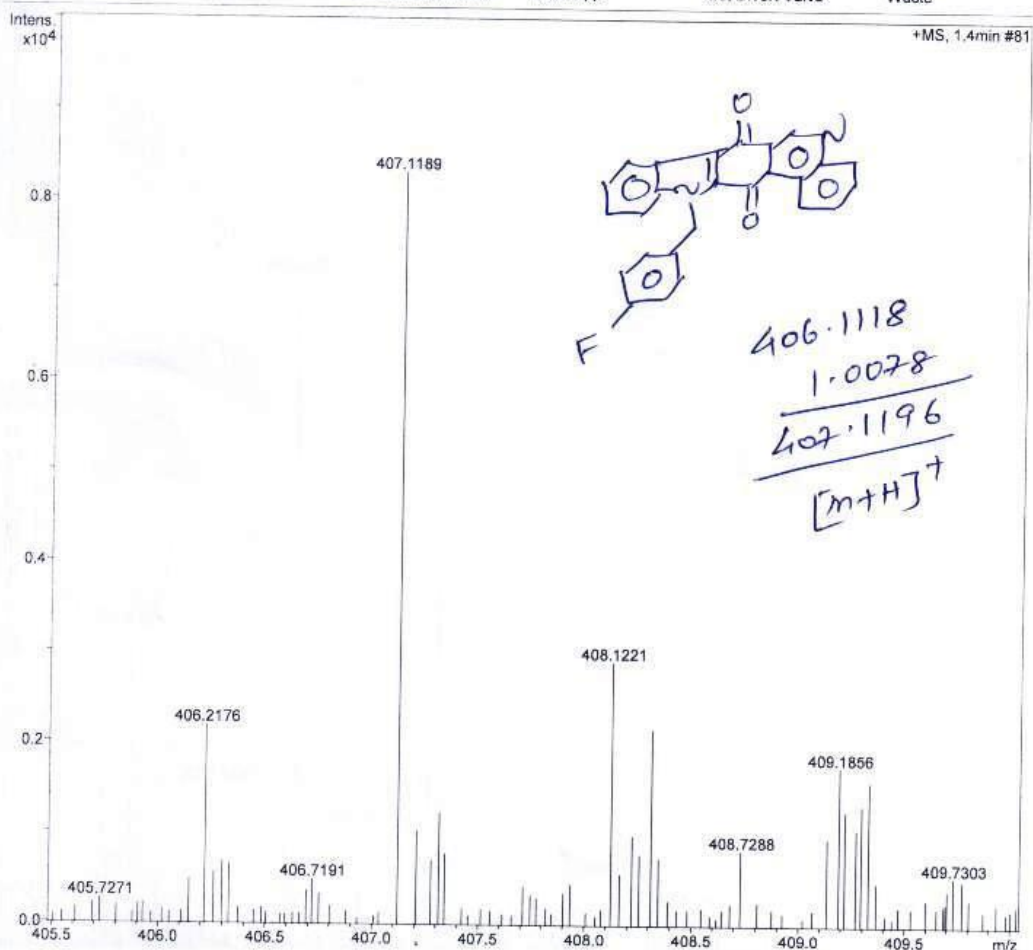

**<sup>1</sup>H and <sup>13</sup>C NMR of 12-(3,4-dimethoxybenzyl)-7H-indolo[3,2-*j*]phenanthridine-7,13(12*H*)-dione (9f)**

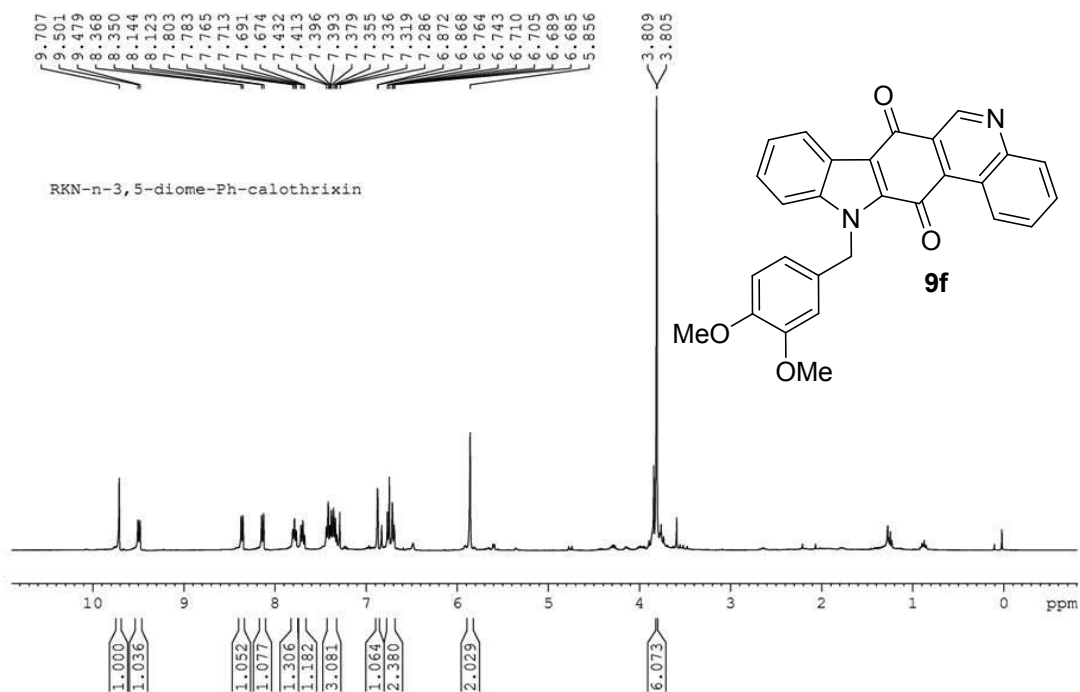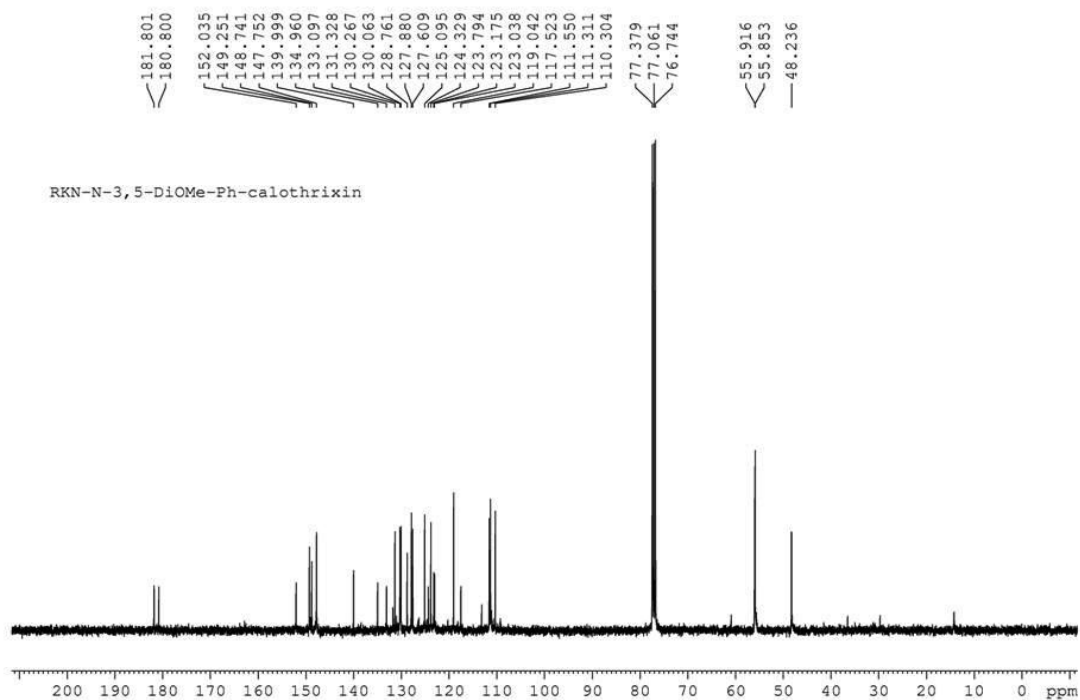

HRMS of 12-(3,4-dimethoxybenzyl)-7H-indolo[3,2-j]phenanthridine-7,13(12H)-dione  
(9f)

BRUKER MAXIS HRMS REPORT

School of Chemistry  
University of Hyderabad

Analysis Info

Analysis Name D:\Data\2015\DrNagarajan\JUNE\RKN-448R.d  
Method TL-P.m  
Sample Name RKN-448-MEOH  
Comment

Acquisition Date 6/5/2015 12:19:20 PM

Operator Ramu Sridhar  
Instrument maXis 10138

Acquisition Parameter

|             |            |                       |           |                  |           |
|-------------|------------|-----------------------|-----------|------------------|-----------|
| Source Type | ESI        | Ion Polarity          | Positive  | Set Nebulizer    | 4.4 psi   |
| Focus       | Not active | Set Capillary         | 3800 V    | Set Dry Heater   | 180 °C    |
| Scan Begin  | 50 m/z     | Set End Plate Offset  | -500 V    | Set Dry Gas      | 4.0 l/min |
| Scan End    | 600 m/z    | Set Collision Cell RF | 350.0 Vpp | Set Divert Valve | Waste     |

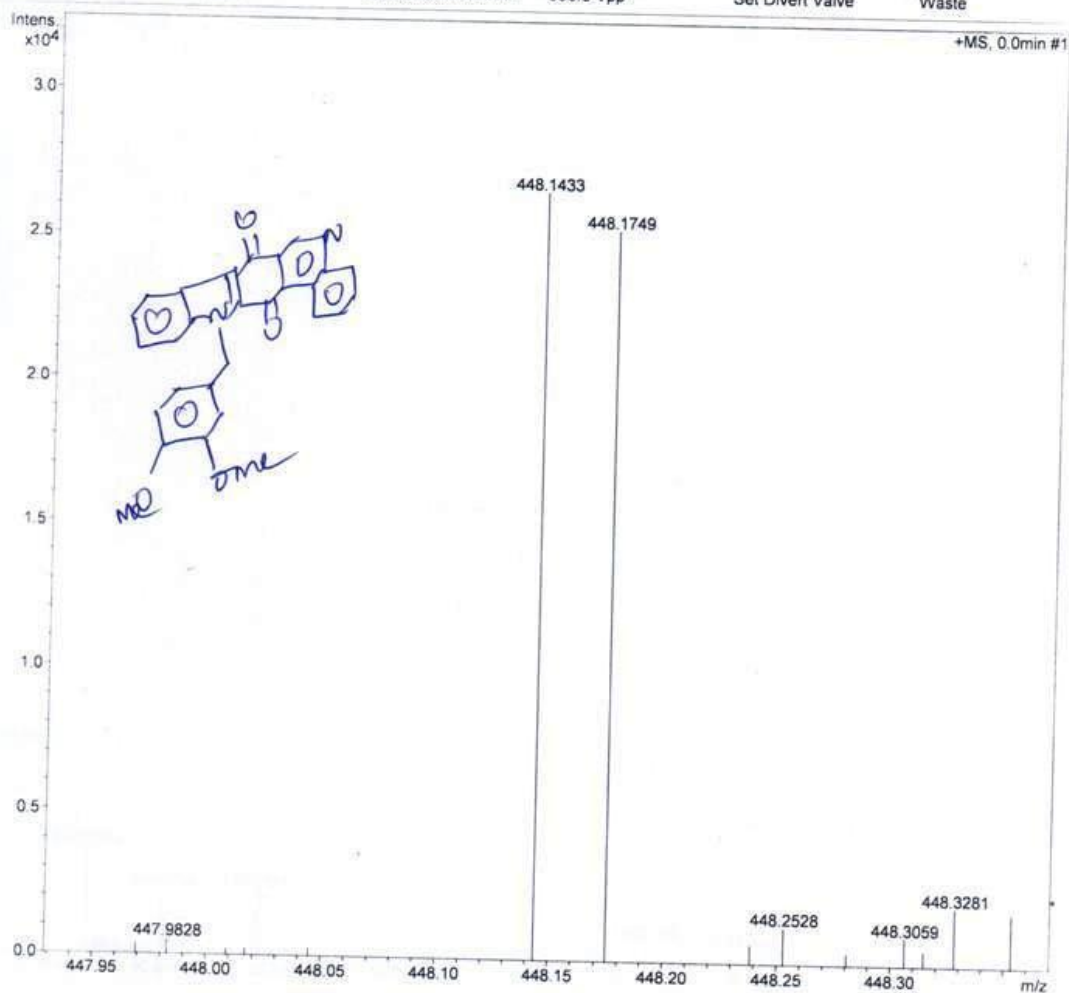



**<sup>1</sup>H and <sup>13</sup>C NMR of 12-(2,4-dichlorobenzyl)-7H-indolo[3,2-j]phenanthridine-7,13(12H)-dione (9g)**

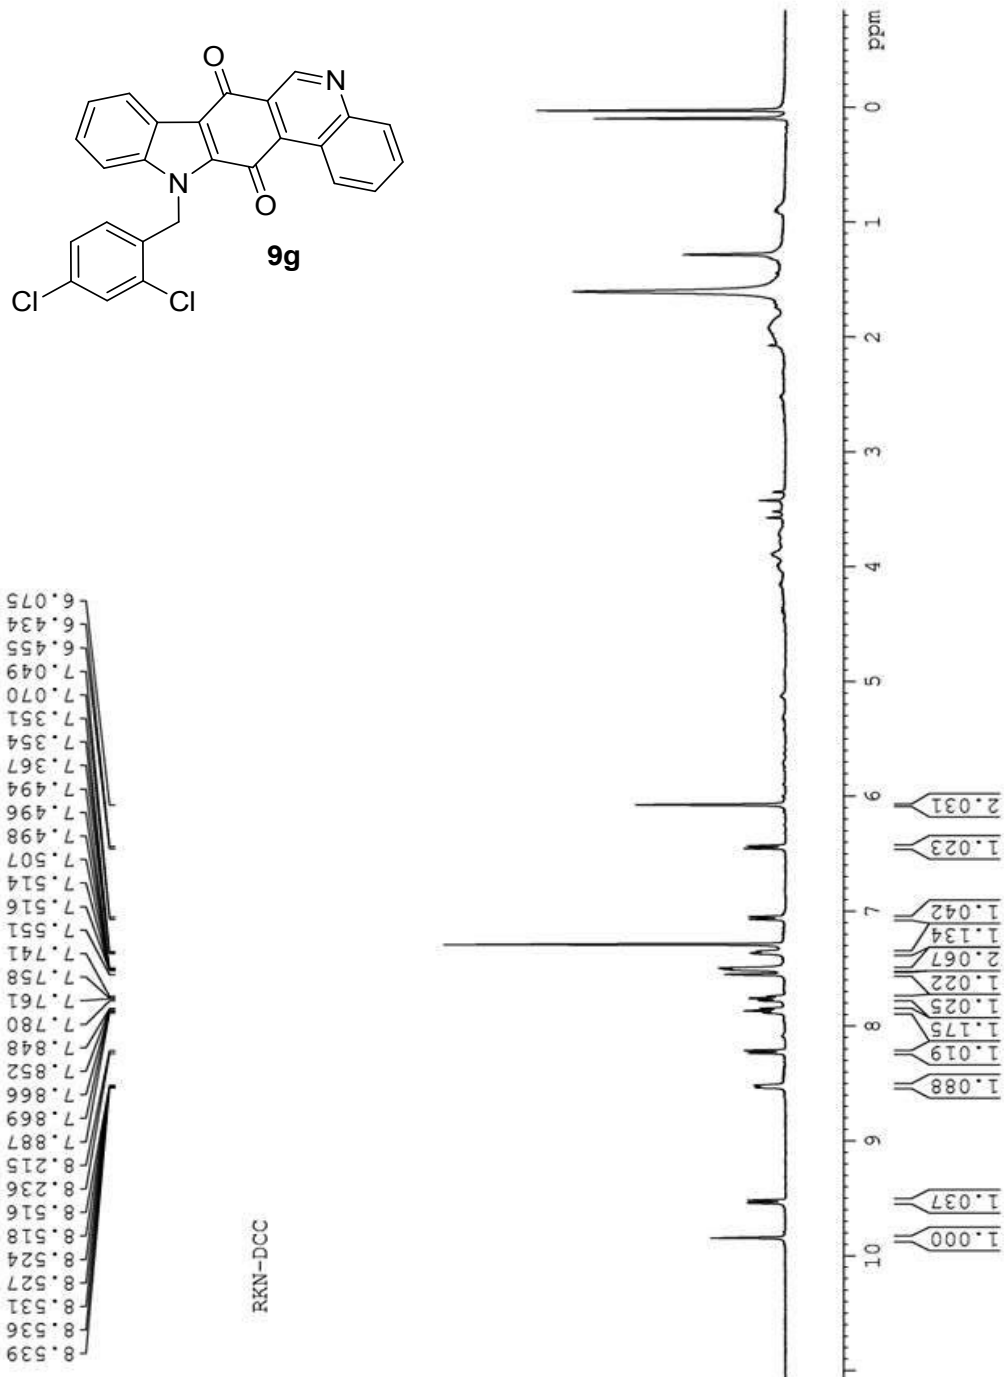

HRMS of 12-(2,4-dichlorobenzyl)-7H-indolo[3,2-j]phenanthridine-7,13(12H)-dione (9g)

BRUKER MAXIS HRMS REPORT

School of Chemistry  
University of Hyderabad

Analysis Info

Analysis Name D:\Data\2015\DrNagarajan\JUNE\RKN-4561.d  
Method tune\_low.m  
Sample Name RKN-456-MEOH  
Comment

Acquisition Date 6/30/2015 1:07:58 PM

Operator Ramu Sridhar  
Instrument maXis 10138

Acquisition Parameter

|             |            |                       |           |                  |           |
|-------------|------------|-----------------------|-----------|------------------|-----------|
| Source Type | ESI        | Ion Polarity          | Positive  | Set Nebulizer    | 4.0 psi   |
| Focus       | Not active | Set Capillary         | 4500 V    | Set Dry Heater   | 180 °C    |
| Scan Begin  | 50 m/z     | Set End Plate Offset  | -500 V    | Set Dry Gas      | 4.0 l/min |
| Scan End    | 1700 m/z   | Set Collision Cell RF | 150.0 Vpp | Set Divert Valve | Waste     |

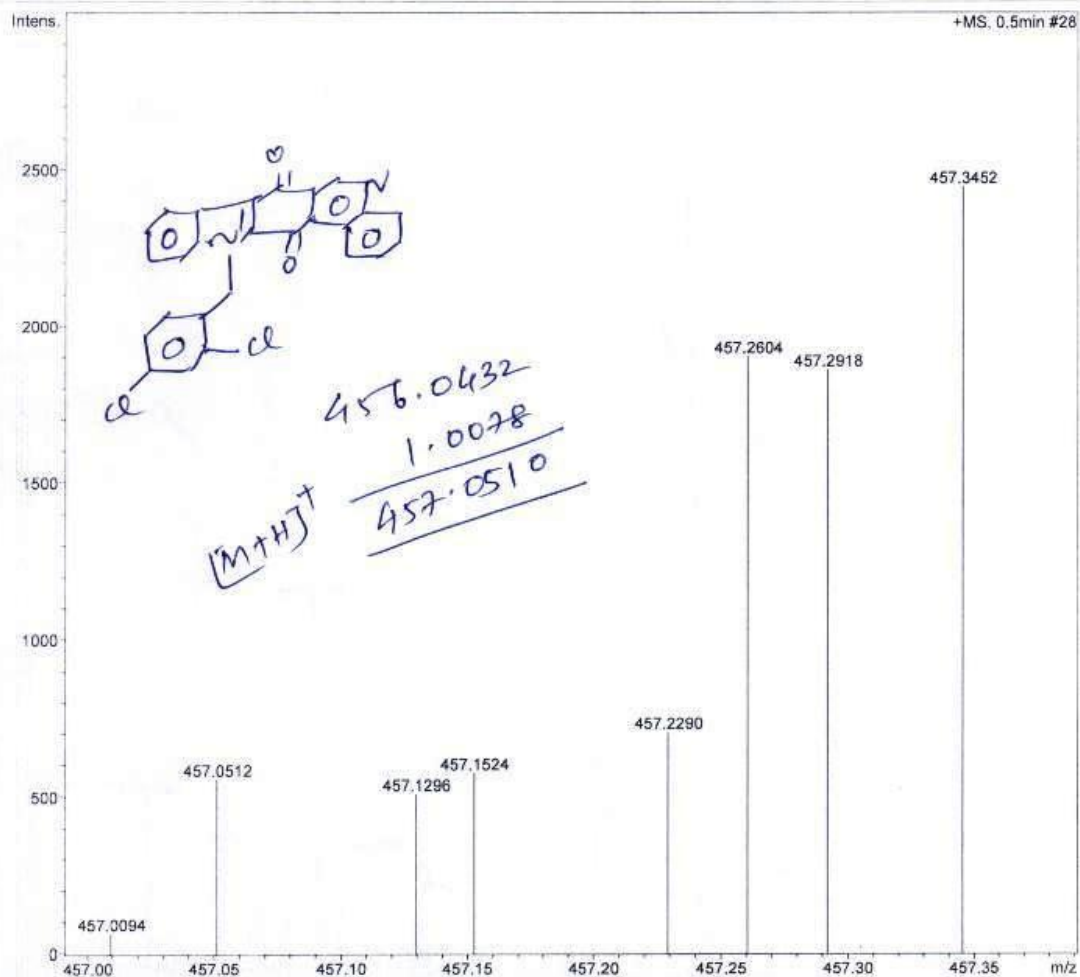

**<sup>1</sup>H and <sup>13</sup>C NMR of 12-(3-methoxybenzyl)-7*H*-indolo[3,2-*j*]phenanthridine-7,13(12*H*)-dione (9h)**

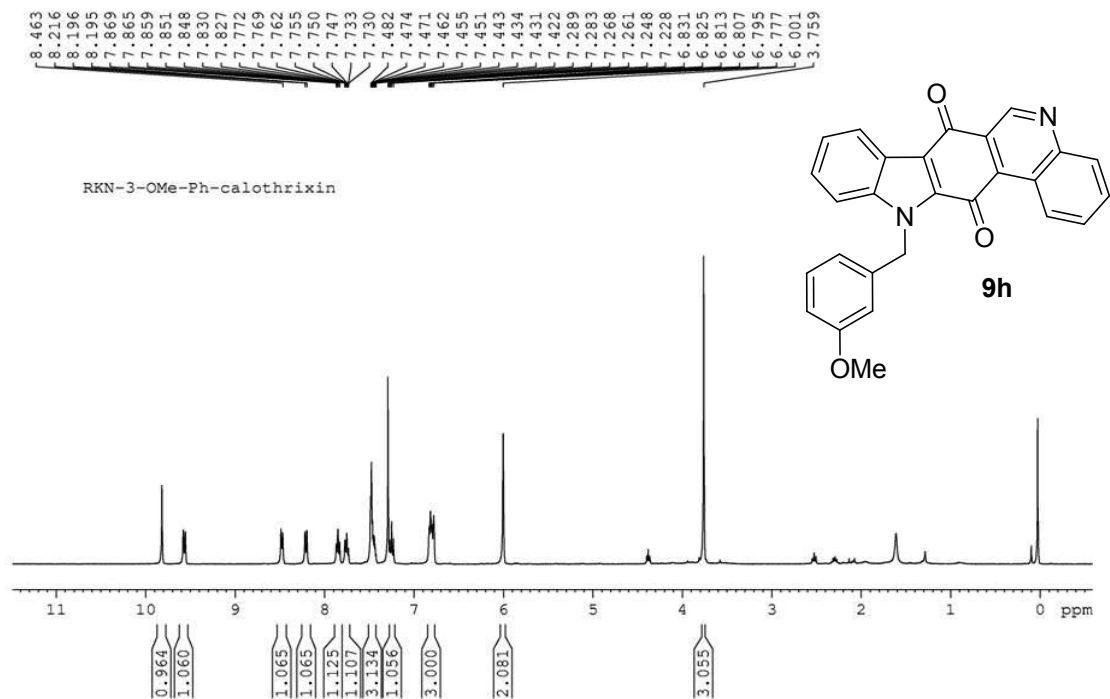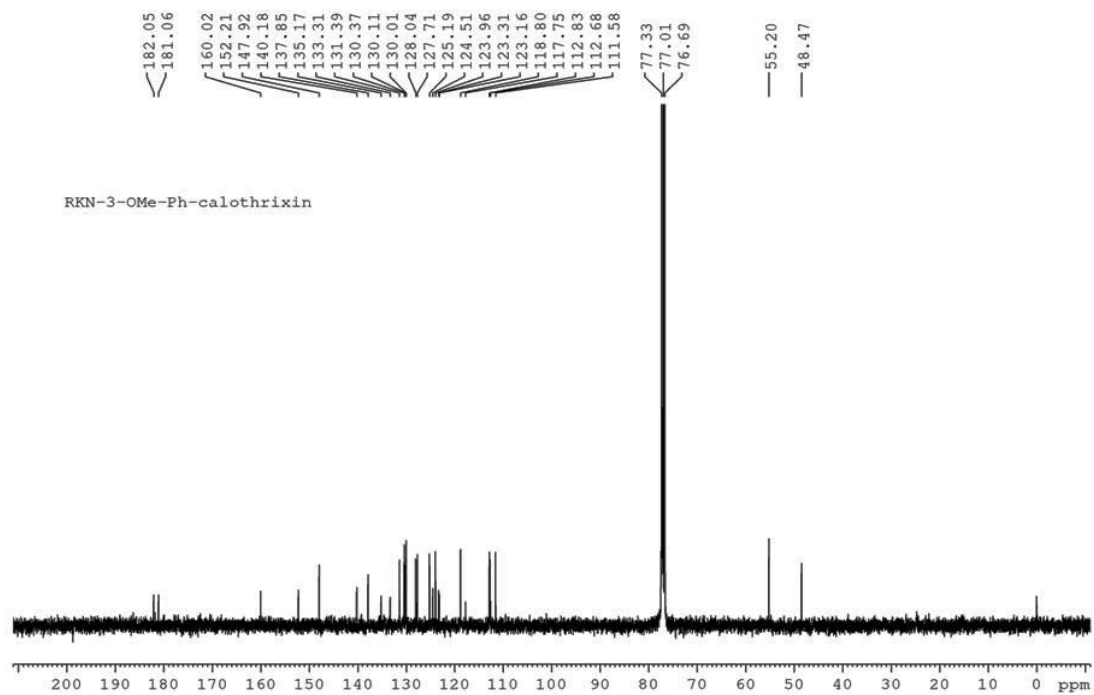

# HRMS of 12-(3-methoxybenzyl)-7H-indolo[3,2-j]phenanthridine-7,13(12H)-dione (9h)

## BRUKER MAXIS HRMS REPORT School of Chemistry University of Hyderabad

### Analysis Info

Analysis Name D:\Data\2015\DrNagarajan\JUNE\RKN-418-3.d  
Method tune\_low\_Pos.m  
Sample Name RKN-418-3-MEOH  
Comment

Acquisition Date 6/5/2015 11:59:43 AM

Operator Ramu Sridhar  
Instrument maXis 10138

### Acquisition Parameter

|             |            |                       |           |                  |           |
|-------------|------------|-----------------------|-----------|------------------|-----------|
| Source Type | ESI        | Ion Polarity          | Positive  | Set Nebulizer    | 4.4 psi   |
| Focus       | Not active | Set Capillary         | 4500 V    | Set Dry Heater   | 180 °C    |
| Scan Begin  | 50 m/z     | Set End Plate Offset  | -500 V    | Set Dry Gas      | 4.0 l/min |
| Scan End    | 1500 m/z   | Set Collision Cell RF | 350.0 Vpp | Set Divert Valve | Waste     |

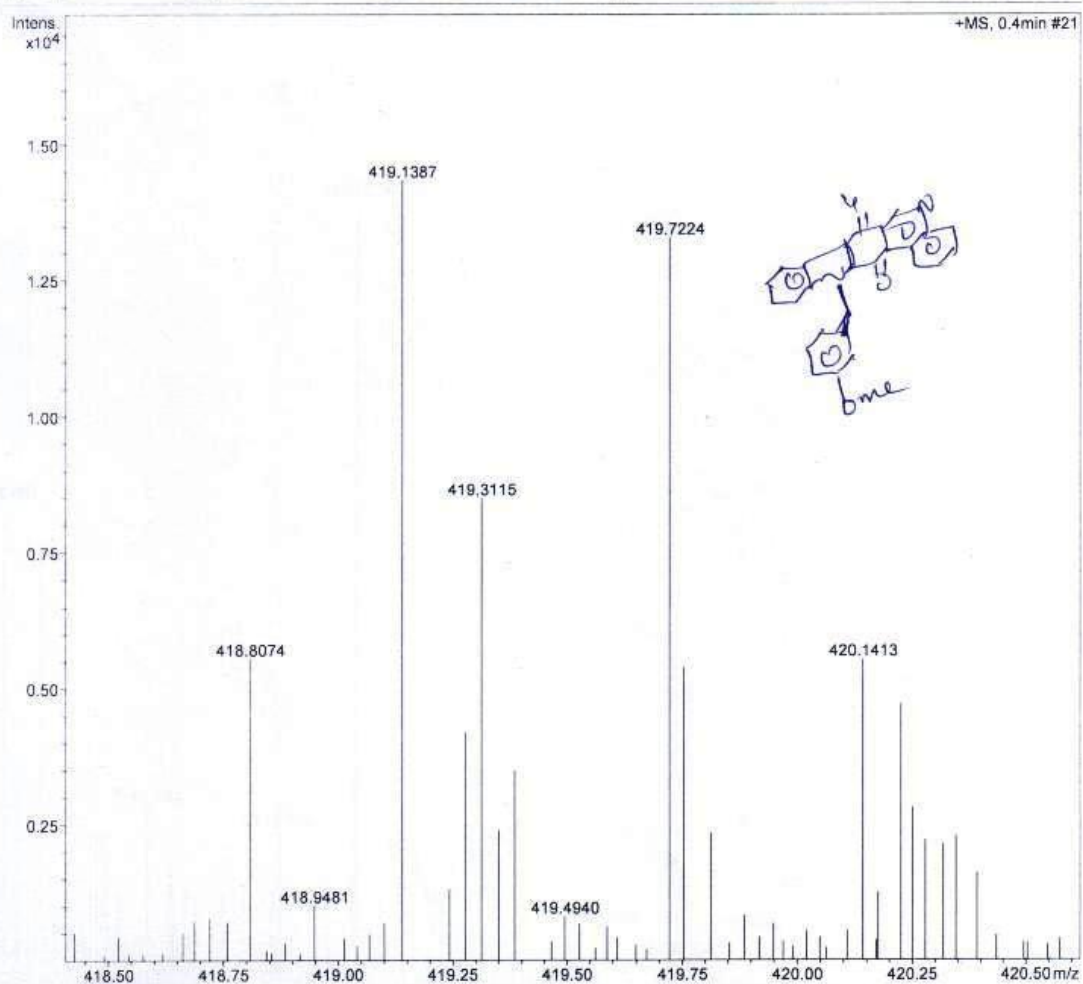

**<sup>1</sup>H and <sup>13</sup>C NMR of 12-(2-bromobenzyl)-7*H*-indolo[3,2-*j*]phenanthridine-7,13(12*H*)-dione (9i)**

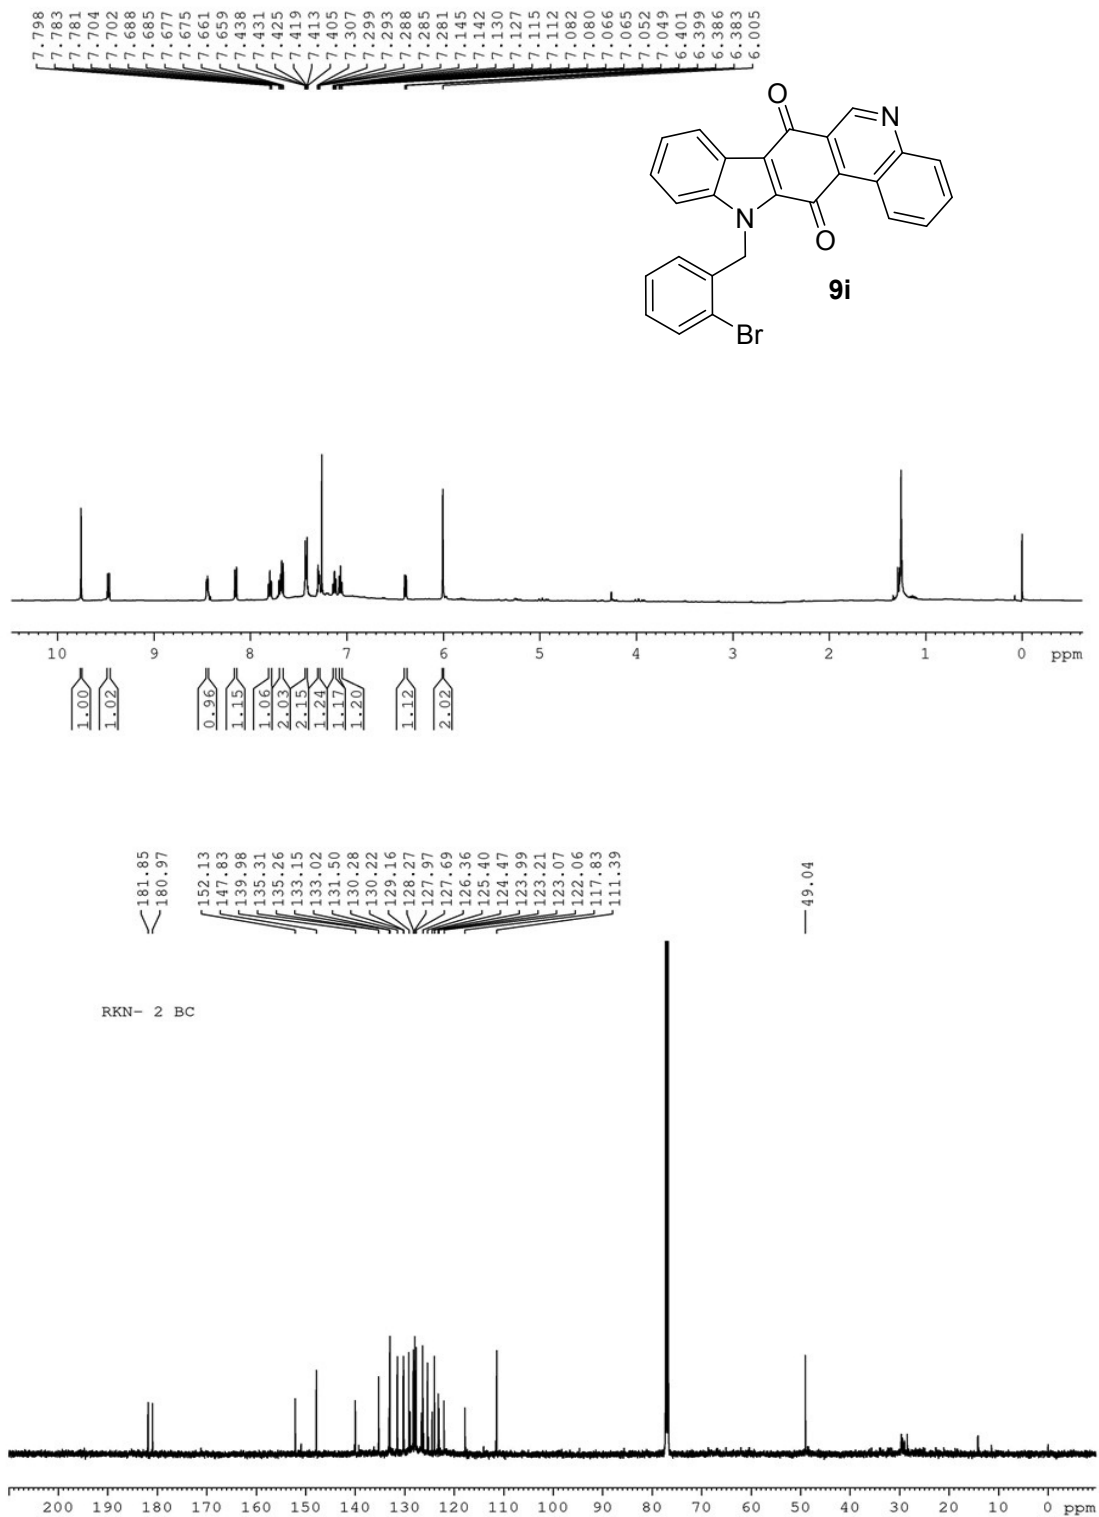

# HRMS of 12-(2-bromobenzyl)-7H-indolo[3,2-j]phenanthridine-7,13(12H)-dione (9i)

## BRUKER MAXIS HRMS REPORT

School of Chemistry  
University of Hyderabad

### Analysis Info

Analysis Name: D:\Data\2015\DrNagarajan\JUNE\RKN-466.d  
Method: tune\_low.m  
Sample Name: RKN-466-MEOH  
Comment:

Acquisition Date: 6/30/2015 1:21:30 PM

Operator: Ramu Sridhar  
Instrument: maXis 10138

### Acquisition Parameter

|             |            |                       |           |                  |           |
|-------------|------------|-----------------------|-----------|------------------|-----------|
| Source Type | ESI        | Ion Polarity          | Positive  | Set Nebulizer    | 4.0 psi   |
| Focus       | Not active | Set Capillary         | 4500 V    | Set Dry Heater   | 180 °C    |
| Scan Begin  | 50 m/z     | Set End Plate Offset  | -500 V    | Set Dry Gas      | 4.0 l/min |
| Scan End    | 1700 m/z   | Set Collision Cell RF | 150.0 Vpp | Set Divert Valve | Waste     |

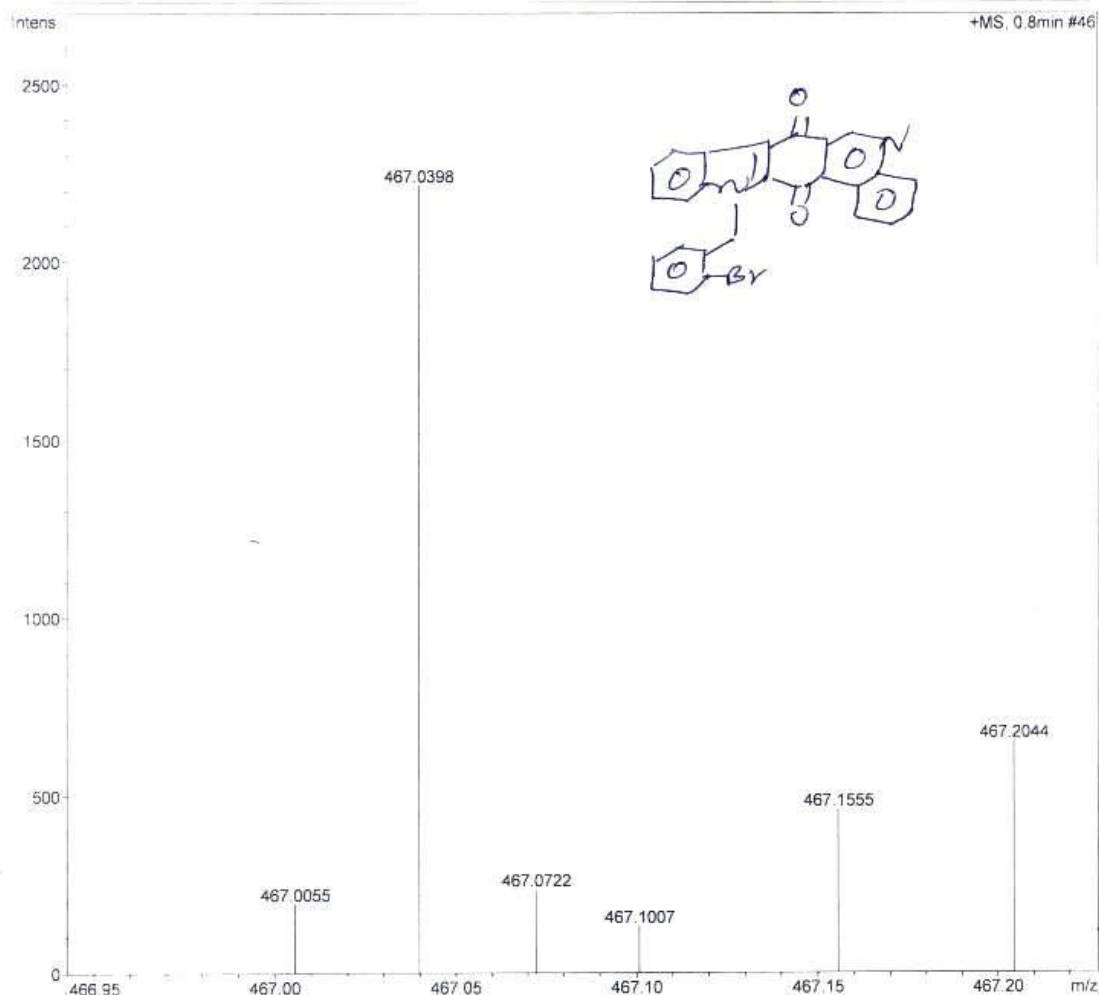

## <sup>1</sup>H and <sup>13</sup>C NMR of 7H-indolo[3,2-j]phenanthridine-7,13(12H)-dione (2)

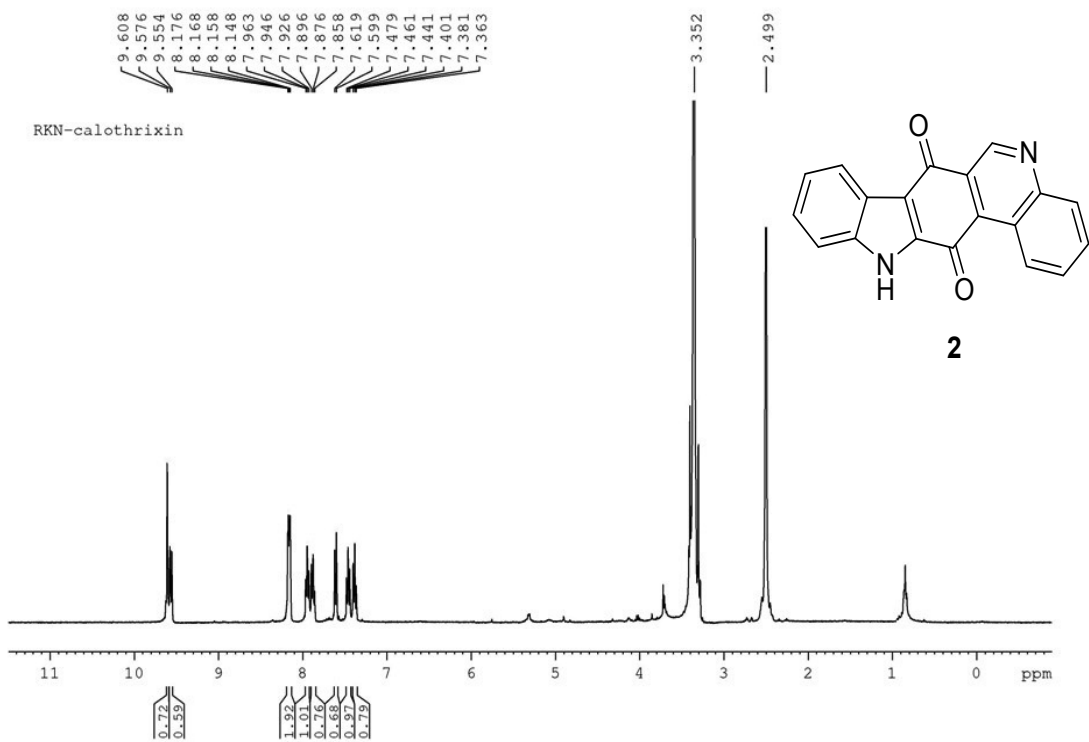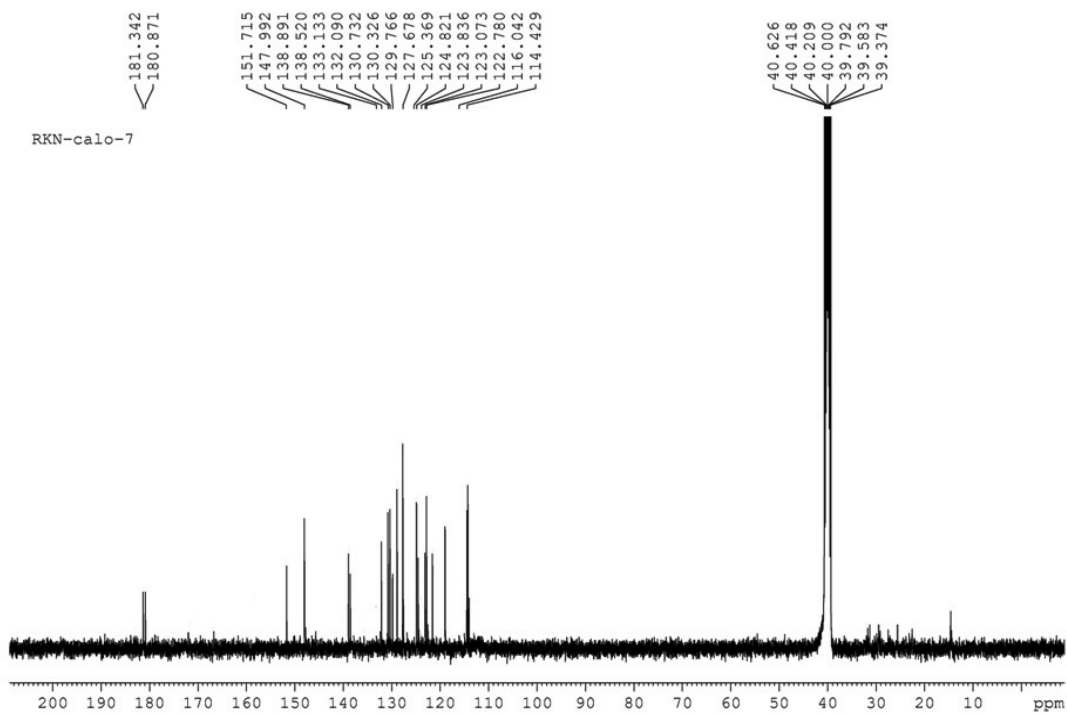

# HRMS of 7H-indolo[3,2-j]phenanthridine-7,13(12H)-dione (2)

## BRUKER MAXIS HRMS REPORT

School of Chemistry  
University of Hyderabad

### Analysis Info

Analysis Name D:\Data\2015\DrNagarajan\JULY\RKN-298-1R2.d  
Method tune\_low.m  
Sample Name RKN-298-1-MEOH  
Comment

Acquisition Date 7/21/2015 11:44:23 AM

Operator Ramu Sridhar  
Instrument maXis 10138

### Acquisition Parameter

|             |            |                       |           |                  |           |
|-------------|------------|-----------------------|-----------|------------------|-----------|
| Source Type | ESI        | Ion Polarity          | Positive  | Set Nebulizer    | 6.0 psi   |
| Focus       | Not active | Set Capillary         | 4500 V    | Set Dry Heater   | 180 °C    |
| Scan Begin  | 50 m/z     | Set End Plate Offset  | -500 V    | Set Dry Gas      | 6.0 l/min |
| Scan End    | 1700 m/z   | Set Collision Cell RF | 250.0 Vpp | Set Divert Valve | Waste     |

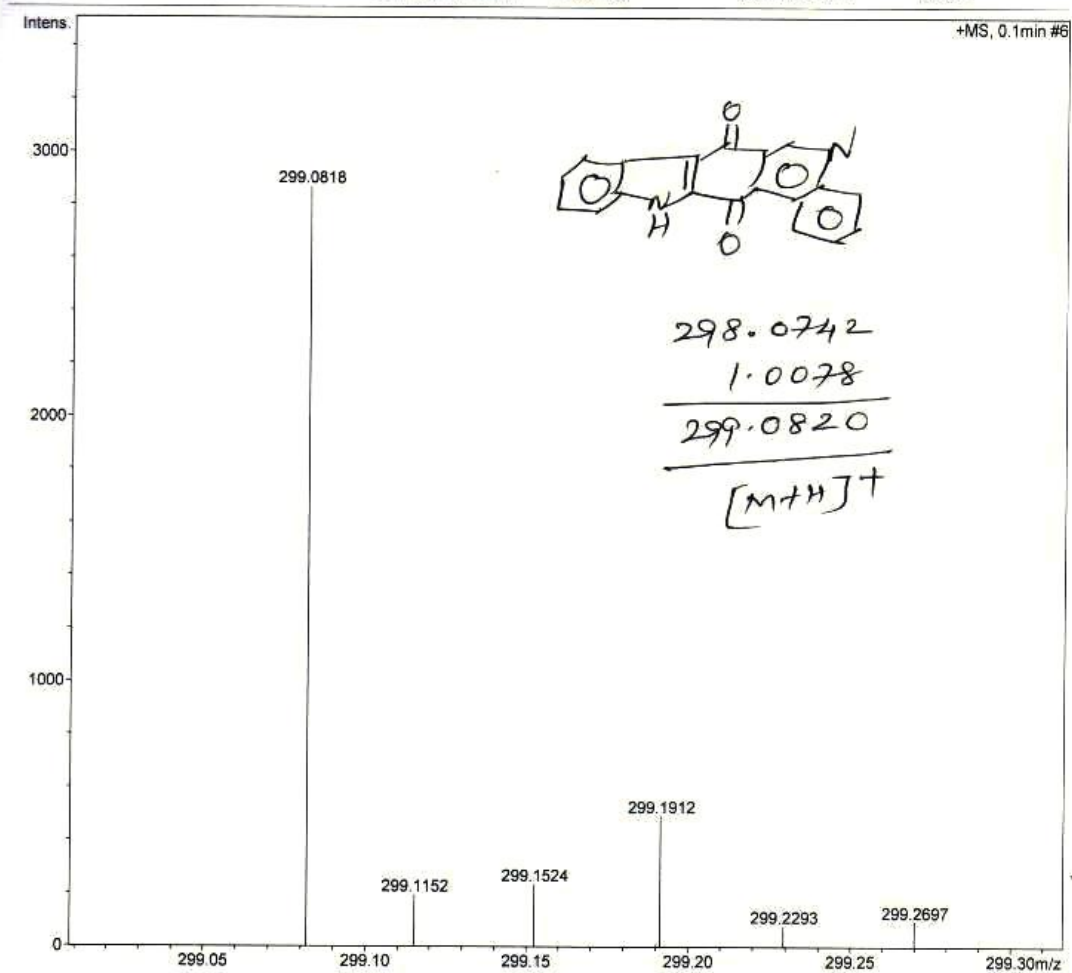

Supplement: c5ra18120h1.pdf [file c5ra18120h1.pdf]
